1 **Localization of infection in neonatal rhesus macaques after oral viral challenge**

2

3 Roslyn A. Taylor<sup>1</sup>, Michael D. McRaven<sup>1</sup>, Ann M. Carias<sup>1</sup>, Meegan R. Anderson<sup>1</sup>, Edgar

4 Matias<sup>1</sup>, Mariluz Araínga<sup>2</sup>, Edward J. Allen<sup>1</sup>, Kenneth A. Rogers<sup>2</sup>, Sandeep Gupta<sup>3,4</sup>, Viraj

5 Kulkarni<sup>3</sup>, Samir Lakhashe<sup>3,4</sup>, Ramon Lorenzo-Redondo<sup>1,5</sup>, Yanique Thomas<sup>1</sup>, Amanda

6 Strickland<sup>4</sup>, Francois J Villinger<sup>2</sup>, Ruth M. Ruprecht<sup>2,3,4</sup>, Thomas J. Hope<sup>1\*</sup>

7 <sup>1</sup>Department of Cell and Developmental Biology, Northwestern University Feinberg School of

8 Medicine, Chicago, Illinois, United States of America

9 <sup>2</sup>Department of Biology, New Iberia Research Center, University of Louisiana at Lafayette,

10 Lafayette, Louisiana, United States of America

11 <sup>3</sup>Department of Microbiology, Immunology, and Molecular Genetics, University of Texas Health

12 San Antonio, San Antonio, Texas, United States of America

13 <sup>4</sup>Disease Intervention and Prevention, Texas Biomedical Research Institute, San Antonio, Texas,

14 United States of America

15 <sup>5</sup>Center for Pathogen Genomics and Microbial Evolution, Northwestern University Institute for

16 Global Health, Chicago, Illinois, United States of America

17

18 \*[thope@northwestern.edu](mailto:thope@northwestern.edu)

19

20 **Abstract**

21 While vertical transmission of human immunodeficiency virus (HIV) can occur *in utero* and

22 during delivery and through breastfeeding. We utilized Positron Emission Tomography (PET)

23 imaging coupled with fluorescent microscopy of <sup>64</sup>Cu-labeled photoactivatable-GFP-HIV (PA-

24 GFP-BaL) to determine how HIV virions distribute and localize in neonatal rhesus macaques  
25 two and four hours after oral viral challenge. Our results show that by four hours after oral viral  
26 exposure, HIV virions localize to and penetrate the rectal mucosa. We also used a dual viral  
27 challenge with a non-replicative viral vector and a replication competent SHIV-1157ipd3N4 to  
28 examine viral transduction and dissemination at 96 hours. Our data show that while SHIV-  
29 1157ipd3N4 infection can be found in the oral cavity and upper gastrointestinal (GI) tract, the  
30 small and large intestine contained the largest number of infected cells. Moreover, we found that  
31 T cells were the biggest population of infected immune cells. Thus, thanks to these novel  
32 technologies, we are able to visualize and delineate of viral distribution and infection throughout  
33 the entire neonatal GI tract during acute viral infection.

34

### 35 **Author Summary**

36 Approximately 1.8 million children are currently living with human immunodeficiency virus  
37 (HIV). While mother-to-child HIV transmission can occur *in utero* and during delivery, it most  
38 commonly occurs through breastfeeding, creating the need to understand how the virus moves  
39 throughout the body and infects the infant once breast milk is consumed. Here, we used multiple  
40 imaging techniques and PCR to determine how HIV distributes throughout the gastrointestinal  
41 tract after oral viral exposure and in which tissues and cell types become acutely infected. We  
42 found that HIV rapidly spreads throughout and penetrates the entire gastrointestinal tract as early  
43 as four hours after exposure. We also found that the intestine contained the largest number of  
44 infected cells at 96 hours and that most cells infected were T cells. Our study shows that these  
45 imaging technologies allow for the examination of viral distribution and infection in a rhesus  
46 macaque model.

47

## 48 **Localization of infection in neonatal rhesus macaques after oral viral challenge**

49

### 50 **Introduction**

51 Mothers living with human immunodeficiency virus (HIV) and not on antiretroviral  
52 therapy have up to a 40% chance of passing HIV to their children [1]. Despite findings that  
53 suggest that exclusively breastfeeding infants can reduce HIV acquisition [2,3], breastfeeding  
54 remains one of the main routes through which vertical HIV transmission occurs [1,4]. This most  
55 likely occurs during the transition from breastfeeding to the introduction of solid foods [5] and  
56 possibly through the pre-mastication of food by people living with HIV [6]. Regardless of their  
57 antiretroviral regimen, many women living with HIV need to breastfeed their infants due to  
58 limited resources in developing countries where the overall benefit of breastfeeding outweighs  
59 the risk for other life-threatening infectious diseases, creating a great need to understand the  
60 mechanism of mother-to-child HIV transmission through oral viral exposure.

61 Non-human primates (NHP) provide a model of and an opportunity to investigate oral  
62 vertical HIV transmission *in vivo*. NHP models of oral HIV viral exposure results in rapid  
63 systemic infection using various methods of viral delivery as it has previously been shown that  
64 four-week-old neonatal rhesus macaques (RMs) have high viral blood titers after oral challenge  
65 with SIVmac251, which inversely correlated to survival [7]. Likewise, additional studies have  
66 proven similar; for example, direct application of SIVmac251 to tonsils and the cheek pouch  
67 resulted in systemic viral infection within seven days and two weeks, respectively [8,9]. Another  
68 study showed SIVmac251 DNA was concentrated in tissues of the head and neck, and systemic  
69 viral dissemination occurred four days after exposure when delivered dropwise into the mouth

70 [10]. Lastly, recent reports also show that SIVmac251 RNA can be found in the brain and lungs  
71 72 and 96 hours after challenge and SIV DNA is found throughout the gastrointestinal (GI) tract  
72 96 hours after oral challenge [11].

73 HIV infects and depletes CD4<sup>+</sup> cells in mucosal tissues, resulting in a decrease of CD4<sup>+</sup>  
74 T cells in the blood [12,13]. CD4<sup>+</sup> T cells in neonates have higher rates of cell metabolism,  
75 proliferation and “activated” cell phenotypes [14,15] making them prime candidates for viral  
76 infection. Therefore, the rapid spread of viral infection in infants is most likely due to this  
77 immature highly metabolic immune system [16,17]. To demonstrate this CD4<sup>+</sup> T cell  
78 vulnerability to acute viral infection, Amedee et al., illustrated the presence of SIV RNA in tonsil  
79 and mesenteric lymph node T cells 72 hours after oral challenge [11]. Furthermore, another study  
80 reported that bottle fed neonatal RMs resulted in a reduction in CD4<sup>+</sup> counts in the blood during  
81 systemic infection a week after viral challenge [18]. Furthermore, neonates have a higher number  
82 of CD4<sup>+</sup> T cells in various tissues compared to adults [19,20], which could contribute to viral  
83 spread. In adult RMs, recent studies have focused on identifying which CD4<sup>+</sup> T helper (Th) cell  
84 subsets are highly susceptible to HIV/SIV infection, with an emphasis on Th17 cells [21]. It has  
85 been shown that Th17 cells are preferentially infected in adult RMs after acute viral exposure in  
86 the female reproductive tract [22]. Additionally, Th17 cells have been shown to play an  
87 important role in HIV infection in the adult human colon [23,24]. The potential role of Th17  
88 cells has not yet been elucidated in neonates.

89 Despite the advances in understanding mother-to-child transmission, the exact sites of  
90 viral distribution and entry in breastfed infants remains unknown. This study utilizes three  
91 different viruses (or virus-like particles) delivered in a bottle-fed neonatal RM model [25] to  
92 examine possible sites of viral entry and infection after acute oral viral exposure. First, whole

93 body Positron Emission Tomography and Computerized Tomography (PET/CT) imaging [26,27]  
94 was coupled with fluorescent microscopy of a photoactivatable-GFP HIV-BaL (PA-GFP-BaL)  
95 [28-30] to determine the distribution and localization of individual HIV virions two and four  
96 hours after viral challenge. Using PET/CT guided necropsy, we determined that HIV virions  
97 distribute to and penetrate the mucosal epithelium throughout the entire gastrointestinal (GI)  
98 tract, including the rectum, four hours after oral viral exposure. To study viral infection and viral  
99 cell targets, subsequent experiments used a dual viral challenge system, utilizing a non-  
100 replicative reporter virus [31] and a replicative SHIV-1157ipd3N4 [32]. Using our non-  
101 replicative reporter virus, we found the tongue may be a main site of viral transduction.  
102 Additionally, in congruence with previous findings [9-11], we found that the entire GI tract is  
103 susceptible to SHIV-1157ipd3N4 infection 96 hours after oral challenge. Likewise, the small  
104 intestine was identified as the tissue that held the biggest foci of infection by fluorescent  
105 deconvolution microscopy, with T cells encompassing the largest infected population of cells.  
106 These findings can provide mechanistic insight and increase our understanding of mother-to-  
107 child transmission after viral exposure.

108

## 109 **Results**

### 110 **PET/CT imaging illustrates that HIV virions distribute throughout the GI tract four hours** 111 **after oral viral exposure**

112 The technologies of PET/CT imaging, photoactivatable HIV (PA-GFP-BaL), and  
113 fluorescent deconvolution microscopy [28-30] were combined to determine where virus  
114 distributes throughout the body after oral exposure. PET/CT imaging allows for the *in vivo*  
115 tracking of virions over time after challenge through radiolabeling PA-GFP-BaL with a

116 radioactive isotope of copper,  $^{64}\text{Cu}$  (**Fig 1A**). During tissue processing, tissues are cut into 1cm  
117 pieces, frozen into blocks with optimal cutting temperature medium (OCT), and each block is  
118 scanned to identify individual blocks with positive radioactivity, thereby increasing our chances  
119 of finding HIV virions by microscopy (**Fig 1B and 1C** [30]). These experiments occurred in  
120 pairs, with one two-hour animal and one four-hour animal for each experimental day. The same  
121 viral stock was used in all four animals.

122 Two hours after oral exposure of PA-GFP-BaL- $^{64}\text{Cu}$ , PET scans revealed radioactivity  
123 throughout the GI tract up to the transverse colon in both two-hour animals. Four hours after oral  
124 exposure, radioactivity was observed throughout the GI tract to the colon including the length of  
125 the rectum (**Fig 2A-D**). In one of the four-hour animals, PET signal was not found past the  
126 descending colon, which was most likely due to a bubble of trapped gas that was observed upon  
127 colon resection (**Fig 2C**). PET imaging of individual tissue blocks confirmed our findings from  
128 the whole-body PET imaging in all four animals (**Fig 1B**); despite the gas obstruction observed  
129 in one animal, individual radioactive blocks up to and including the transverse colon were found  
130 in both two-hour animals and throughout the length of the GI to the rectum in both four-hour  
131 animals (**Fig 2C**).

132

133 **HIV virions distribute throughout the entire length of the GI tract four hours after oral**  
134 **viral exposure**

135 Next, fluorescent deconvolution microscopy was performed to identify the total number  
136 of individual HIV virions (non-penetrating and penetrating) in individual tissue blocks that had  
137 strong radioactivity by PET imaging (**Fig 1C**). Penetrating virions were defined as being one  
138 micron from the epithelial surface. Because virions were not found in every tissue of the GI tract

139 in all animals, the GI tract was dichotomized into upper (esophagus and stomach) and lower  
140 (small intestine and colon) sections. Although the distance to which HIV virions distributed after  
141 oral challenge extended to the transverse colon, the majority of the virions were located in the  
142 oral cavity (buccal, tongue, and tonsil; mean = 26.5 virions, frequency = 0.97) in animals  
143 necropsied two hours post-challenge. We also observed significantly fewer numbers (FDR<0.05)  
144 and a lower frequency of virions both in the upper (mean = 1.67 virions, frequency = 0.50) and  
145 lower (mean = 2.25 virions, frequency = 0.22) GI tract compared to the oral cavity two hours  
146 after viral exposure (**Fig 2E, F**). However, in the four-hour animals, fewer virions were found in  
147 the oral cavity (mean = 0.75 virions, frequency = 0.03). The highest number of the virions found  
148 in the four-hour animals was in the lower GI tract (mean = 7.83 virions, frequency = 0.78; **Fig**  
149 **2E, F**). The same number and frequency of virions were found in the upper GI tract (mean=1.67  
150 virions, frequency = 0.50) in the four-hour animals as the two-hour animals.

151 Similar results were found when specifically examining the number of virions that  
152 penetrated into the mucosa (**Fig 2G**). In the two-hour animals, the largest number of penetrating  
153 virions were found in the oral cavity (sum of virions in both two-hour animals: non-penetrating =  
154 26 virions, penetrating = 80 virions) with statistically significant differences observed both  
155 between this cavity and the upper (non-penetrating = 3, penetrating = 7) and lower GI tract  
156 (non-penetrating = 9, penetrating = 15; FDR<0.05). Likewise, in the four-hour animals, the  
157 majority of penetrating virions were found in the lower GI tract (non-penetrating = 19 virions,  
158 penetrating = 75 virions), although among the very few virions found in the oral cavity, all of  
159 them were penetrating virions (penetrating = 3). In the upper GI tract, few virions were found at  
160 four hours (non-penetrating = 1, penetrating = 8) There was no difference in penetration depth  
161 between location of virion or time point after oral challenge (**Fig 2H**) with the exception of the

162 few virions found in the oral cavity at four hours that proportionally were also significantly  
163 deeper penetrators. These data, combined, demonstrate the validity of PET/CT to identify areas  
164 of virus accumulation along with illustrating that HIV virions can distribute throughout the entire  
165 GI tract four hours after oral viral exposure in neonates.

166

### 167 **Validating our dual challenge oral transmission model**

168 While PET/CT and PA-GFP-BaL-<sup>64</sup>Cu experiments allow for the visualization of virion  
169 distribution and penetration into mucosal tissues, these technologies do not allow for the  
170 examination of viral infection. Therefore, to study viral infection, subsequent experiments orally  
171 challenged neonatal RM with LICH, a non-replicative reporter virus [31], and a replicative  
172 SHIV-1157ipd3N4 [32]. Our lab has previously shown that we can locate and identify cells that  
173 were first transduced by the challenge inoculum through a viral vector, LICH [31]. Due to the  
174 lack of accessory genes in LICH, the replication process gets halted after one round of viral  
175 integration, thus resulting in viral transduction. In a proof-of-principle experiment, one animal  
176 was orally challenged with 8mL of LICH alone and then sacrificed at 96 hours after challenge to  
177 validate whether LICH can be used to identify sites of viral transduction after oral challenge.  
178 Tissues from the GI tract were extracted and analyzed by IVIS. We were able to identify  
179 luciferase signal on IVIS in the esophagus, neck lymph nodes, and stomach of neonatal RMs at  
180 96 hours after oral exposure (**Fig 3A**).

181

### 182 **Identifying tissues susceptible to viral transduction and infection**

183 Since we were able to observe luminescence by IVIS after oral challenge, we proceeded  
184 to use a dual viral challenge model for the remaining experiments. We have previously shown



185 that LICH can be used as a guide to locate areas of replicative foci of infection, as LICH  
 186 disseminates throughout the body similar to replicative viruses [22,31]. Because LICH does not  
 187 replicate, an SIV containing an R5-tropic HIV Clade C *env* genes, SHIV-1157ipd3N4, was used  
 188 to study viral replication. Because LICH does not contain accessory genes, we could distinguish  
 189 SHIV-1157ipd3N4 infected cells from LICH transduced cells by examining replicative viral  
 190 infection by gag DNA and protein. To identify tissues that are initially susceptible to viral  
 191 transduction and infection, genomic DNA was extracted and performed nested PCR to target  
 192 mCherry and gag DNA. In a proof-of-principle experiment, one neonatal RM (RM13) was  
 193 challenged with four feedings of 2mL of LICH and a repeated low dose of SHIV-1157ipd3N4  
 194 (see Experimental Methods) and necropsied shortly after two days of viral challenge to examine  
 195 early transmission events. Results from the low dose challenge and 53-hour time point showed  
 196 less transduction and infection, as predicted. At 53 hours post-oral challenge, we found mCherry  
 197 DNA in the top of the tongue (**Table 1**). Gag DNA was found in the neck lymph nodes, stomach,  
 198 and small intestine at 53 hours post-challenge.

**Table 1: Distribution of LICH transduction and SHIV-1157ipd3N4 DNA throughout the GI tract after oral challenge**

| Animal | Challenge           | Tongue | Cheek | Soft Palate | Tonsil | Neck Lymph Nodes | Esophagus | Stomach | Small Intestine | Large Intestine | Spleen | Liver |
|--------|---------------------|--------|-------|-------------|--------|------------------|-----------|---------|-----------------|-----------------|--------|-------|
| RM13   | Low Dose<br>53 hrs  | +      |       |             |        | #                | #         | #       | #               |                 |        |       |
| RM10   | High Dose<br>96 hrs | +      | #     | #           | #      |                  | #         | +       | +#              | #               | #      | #     |
| RM17   | High Dose<br>96 hrs | +#     | #     |             | #      | #                | #         | #       | #               | #               | #      |       |

199 LICH viral vector mainly found in the tongue after oral challenge. SHIV-1157ipd3N4 viral dissemination found  
 200 throughout the GI tract after oral challenge. + indicates mCherry DNA found; # indicates gag DNA found

201

202 For the next set of experiments, eight neonatal RMs were orally challenged with a  
203 repeated high dose challenge of SHIV-1157ipd3N4 and one 8mL bolus of LICH, which was  
204 given during the last bottle feeding, and the time between challenge and necropsy was extended  
205 to 96 hours prior to nested PCR and fluorescent microscopy being performed, increasing the  
206 potential of finding infected cells and of understanding the mechanism of viral transduction and  
207 infection in our bottle-feeding model. While luciferase activity was previously observed in the  
208 proof-of-principle study, when this group of eight neonates were examined by IVIS, very little  
209 luciferase activity was seen among all the animals; therefore, we performed nested PCR on all  
210 processed tissues. Nested PCR revealed mCherry DNA in the tongue, stomach, and small  
211 intestine in RM10 and in the tongue of RM17. At 96 hours, SHIV-1157ipd3N4 viral  
212 dissemination was more widespread. Gag DNA was found in the cheek, tonsil, soft palate,  
213 esophagus, mesentery, small intestine, large intestine, liver, and spleen of RM10. Gag DNA was  
214 also in the cheek, tongue, tonsil, the transformation zone to the stomach from the esophagus,  
215 small intestine, large intestine, spleen, and neck lymph nodes of RM17 (**Table 1**). When  
216 performing nested PCR, large amounts of tissues are sectioned for DNA isolation. Therefore, to  
217 minimize tissue sample depletion, future experiments primarily focused on fluorescent  
218 microscopy to identify viral transduction instead of utilizing nested PCR to identify infected  
219 tissues.

220

### 221 **LICH transduction identifies initial target cells after oral viral challenge**

222 Tissue sections were then examined by fluorescent deconvolution microscopy to identify  
223 individual LICH transduced cells at 96 hours (**Table 2, Fig. 3**). After a careful and thorough  
224 examination of all tissues, an mCherry<sup>+</sup> cell was found in the tongue of RM22 (**Fig. 3B**).

225 Spectral imaging confirmed that the emission spectrum on this cell matched the known emission  
226 peak of mCherry, 610nm, (**Fig. 3C**), confirming that this cell in the tongue of RM22 was LICH  
227 transduced from the challenge inoculum. Additionally, the trachea of RM23 also contained an  
228 mCherry<sup>+</sup> cell and the stomach of RM25 had several mCherry<sup>+</sup> cells. All the cells were validated  
229 as mCherry<sup>+</sup> on spectral imaging (**Table 2**). However, although we were able to detect and verify  
230 mCherry<sup>+</sup> cells in a few animals, these cells proved difficult to widely identify due to the high  
231 autofluorescent background in the neonatal tissues. Therefore, tissue sections that contained  
232 luciferase activity by IVIS were also stained with antibodies for luciferase. Unfortunately,  
233 despite tissues showing luciferase activity by IVIS, positive luciferase signal was not detected in  
234 any of the neonatal tissues (**Fig. 3D**). Although, we previously used a LICH viral vector in a  
235 model of SIV infection in the female reproductive tract to identify sites of viral transduction [31],  
236 these data suggest that in our oral viral challenge model, LICH technology may not be as  
237 efficient. Therefore, defining SHIV-1157ipd3N4 viral infection, replication, and dissemination in  
238 the oral and gut mucosa was prioritized.

| <b>Animal</b> | <b>Tongue</b> | <b>Tonsil</b> | <b>Stomach</b> |
|---------------|---------------|---------------|----------------|
| RM10          |               |               |                |
| RM17          |               |               |                |
| RM22          | +             |               |                |
| RM23          |               | +             |                |
| RM25          |               |               | +              |
| RM26          |               |               |                |
| RM27          |               |               |                |
| RM28          |               |               |                |

239 LICH transduced cells found in the tongue, trachea, and stomach 96 hours after oral challenge by microscopy. Cells

240 were validated by spectral imaging. + indicates mCherry DNA found

241

## 242 **Most infected cells are found in the small intestine after oral viral challenge**

243 To determine which cell types are susceptible to replicative viral infection after oral  
244 exposure, tissues were examined for evidence of SHIV-1157ipd3N4 infection using fluorescent  
245 deconvolution microscopy (**Table 3**). Tissue sections from the oral cavity and GI tracts of each  
246 animal were stained with antibodies directed toward SIV Gag (clone AG3) to identify SHIV-  
247 1157ipd3N4 gag, as well as CD3 and CCR6 to phenotype infected immune cell subsets (**Fig. 4,**  
248 **Table 3**). Five panels consisting of three 40x by five 40x images were taken for phenotype  
249 analysis. As we have previously shown, these markers allow us to identify the target cells as  
250 Th17, T cells, immature dendritic cells (iDCs), and other. In the tongues of neonatal RMs, we  
251 found very small foci of infection; five of the eight animals examined had SHIV-1157ipd3N4  
252 infected cells ( $5.86 \pm 7.36$  cells, median = 4, **Fig. 4C**). Similar to what was observed in the  
253 tongue, the tonsils contained a small number of SHIV-1157ipd3N4 infected cells in six of the  
254 animals ( $13.5 \pm 19.93$  cells, median = 4), corroborating previous studies illustrating tonsils as a  
255 site of potential viral entry after oral viral challenge [8,10,18,33]. The fewest number of infected  
256 SHIV-1157ipd3N4 cells in terms of number of animals and quantity of cells were in the  
257 esophagus ( $5 \pm 12.55$  cells, median = 0.5). While SHIV-1157ipd3N4 infected cells were detected  
258 in the tongue, tonsils, and esophagus, it was not a common event. In contrast, the stomach  
259 contained larger foci of infection compared to those found in the oral cavity and esophagus; all  
260 eight RMs had infected cells in the stomach ( $43.63 \pm 60.82$  cells, median = 20).

261

|                                                                                                            |
|------------------------------------------------------------------------------------------------------------|
| <b>Table 3: Localization of SHIV-1157ipd3N4 infected cells 96 hours after oral challenge by microscopy</b> |
|------------------------------------------------------------------------------------------------------------|

| Animal | Tongue | Tonsil | Esophagus | Stomach | Small Intestine | Large Intestine | Mesenteric Lymph Nodes |
|--------|--------|--------|-----------|---------|-----------------|-----------------|------------------------|
| RM10   | +      | +      | +         | +       | +               | +               |                        |
| RM17   |        | +      |           | +       | +               | +               | NA                     |
| RM22   |        | +      |           | +       | +               | +               | +                      |
| RM23   | +      | +      | +         | +       | +               | +               | +                      |
| RM25   | +      |        |           | +       | +               | +               | NA                     |
| RM26   | +      | +      | +         | +       | +               | +               | NA                     |
| RM27   | +      | +      | +         | +       | +               | +               | NA                     |
| RM28   |        |        |           | +       | +               | +               | NA                     |

262 SHIV-1157ipd3N4 viral dissemination found throughout the GI tract after oral challenge. + indicates AG3+ cells

263 found by microscopy, NA indicates mesenteric lymph nodes were not collected from this animal

264

265 Previously, it has been shown that the intestines are a site of viral expansion in neonates  
266 after intravenous infection [34]; therefore, we examined the small intestine, large intestine, and  
267 their draining mesenteric lymph nodes for foci of SHIV-1157ipd3N4 infection to see if we could  
268 identify similar after oral challenge. All eight RMs in the study had SHIV-1157ipd3N4 infected  
269 cells throughout the small and large intestine. The small intestine contained the largest foci of  
270 infection in all eight neonates ( $367.1 \pm 250.8$  cells, median = 308, **Fig. 4A-B**). Overall, the large  
271 intestine had the second largest foci of infection in the neonates ( $159.4 \pm 88.39$ , median = 176.5,  
272 infected cells, **Fig 4.C, Fig. 5A**). Unfortunately, we were only able to obtain the mesenteric  
273 lymph nodes from three of the eight animals; however, we found SHIV-1157ipd3N4 infected  
274 cells in the mesenteric lymph nodes of two of these three animals (**Table 3**). These data suggest  
275 that viral replication can be found throughout the GI tract, all the way to the distal large  
276 intestines and the corresponding mesenteric lymph nodes after oral viral challenge.

277

278 **The majority of SHIV-1157ipd3N4 infected cells throughout the gut are T cells at 96 hours**  
279 **after oral viral challenge**

280 It has previously been shown that neonates have CD4+ T cells of a memory phenotype  
281 that proliferate at high rates in mucosal tissues, which may make these T cells the primary target  
282 of HIV/SIV infection [34]. Immature dendritic cells (DC) have been suggested to be initial  
283 targets and mediators of HIV/SIV [35-37] infection. Our lab has previously shown that Th17  
284 cells are preferentially infected after vaginal SIV challenge [22]. Taking all these results  
285 together, we stained our tissue sections for T cell marker CD3 and the chemokine receptor CCR6  
286 to investigate which cell types are infected after oral challenge. Infected cells were phenotyped  
287 into the following groups: Th17 T cells (CD3+ CCR6+ AG3+), other T cells (CD3+ AG3+),  
288 Immature DC (CCR6+ AG3+), and other (AG3+). Due to the small number of SHIV-  
289 1157ipd3N4 infected cells found in the tongue, tonsil, and esophagus, our phenotyping analysis  
290 focused on the stomach, small intestine, and large intestine. In the stomach, the majority of  
291 infected cells were other T cell subsets when examining all eight neonates combined (n= 242  
292 cells, 68.95%, **Fig. 5B**). Overall, Th17 T cells were the second largest infected population in the  
293 stomach (n=78 cells, 22.22%). Individually, Th17 T cells made up the largest group of infected  
294 cells in three of the RMs (RM17, RM22, RM26), while other T cell subsets were the largest  
295 group of infected cells in 4 of the RMs (RM23, RM25, RM27, RM28, **SFig 1**). Other cell types  
296 made up 6.55% of total infected cells (n=23 cells) and immature DC were 2.28% of infected  
297 cells (n=8 cells) in the stomach. One neonate, RM10, had very few infected cells (n=3),  
298 however 33.33% of infected cells of Th17 cells, (n=1 cell) other T cells subsets (n=1 cell), and  
299 immature DC (n=1 cell, **SFig 1**). The largest infected population of cells in the small intestine  
300 was other T cells in all eight neonates (n=2468 cells, 76.74%, **Fig 5B, SFig 1**). The second

301 largest infected population found in the small intestine was Th17 T cells (n=655 cells, 20.37%).  
302 Similar to the stomach, few other cell types (n=86 cells, 2.67%) and immature DC (n=7 cells,  
303 0.22%) were infected in the small intestine. Other T cell subsets were marginally infected with  
304 the most in the large intestine (n=651 cells, 51.06%). For example, the large intestine was the site  
305 of the greatest infection in Th17 T cells (n=608 cells, 47.69%, **Fig 5B, SFig 1**); the majority of  
306 infected cells in half of the neonates were Th17 T cells (RM10, RM17, RM26, RM27), while  
307 other T cell subsets were in the remaining four (RM22, RM23, RM25, RM28). Very few  
308 infected immature DC (n=10 cells, 0.78%) and other cell types (n=6 cells, 0.47%) were found in  
309 the large intestine. Overall, our data suggest that T cell subsets that are not Th17 are the greatest  
310 target of infection in our oral transition model, unlike our previous findings after vaginal  
311 challenge [22]. Among all of the animals and tissue types analyzed, very few immature DC and  
312 other cell types were infected.

313

## 314 **Discussion**

315 Previous studies using intravenous inoculation of infant rhesus macaques have provided  
316 great insights into the susceptibility of neonatal RMs to SIV infection [38,39] and CD4+  
317 depletion in the gut after challenge [14,15,34]. However, breastfeeding remains the most  
318 prevalent route for vertical HIV transmission worldwide [1]. This creates a great need to study  
319 oral transmission in neonatal animal models. Here we show that, in a bottle-fed model, HIV  
320 virions rapidly distribute throughout the GI tract and intact particles found as far as the rectum  
321 four hours after oral exposure (**Figs 1 and 2**). We also show that the greatest number of SHIV-  
322 1157ipd3N4 infected cells is in the small intestine and that T cells are primarily infected 96  
323 hours after viral exposure (**Figs 4 and 5**).

324 To determine how HIV virions distribute throughout the body immediately after oral  
325 exposure, we radiolabeled a photoactivatable, fluorescently tagged HIV and performed *in vivo*  
326 PET imaging coupled with deconvolution fluorescent microscopy (**Figs 1 and 2**). While these  
327 PET/CT experiments are not studying viral infection, these technologies provide insight into how  
328 HIV disseminates throughout the body, and where in the oral mucosa and GI tract the virus  
329 enters the mucosa after oral viral exposure. We found that two hours after oral challenge, HIV  
330 virions mainly localize in the oral cavity, but then further disseminate to the transverse colon.  
331 Four hours after challenge, HIV virions are found throughout the small and large intestine; in  
332 both four-hour animals, many virions were also found within the rectum. These experiments  
333 revealed that HIV distributes throughout the GI tract rapidly after oral challenge. In a matter of  
334 two hours, the majority of total virions and penetrating virions changed from the oral cavity to  
335 the lower GI tract consistent with virion penetration of epithelial barriers happening in a wave  
336 followed by lysis or turnover because the signal was lost at the two-hour timepoint (**Fig 2**). It has  
337 been reported that the gastric juice of neonates has a relatively neutral pH compared to adults,  
338 ranging mostly between 7.5 and 8.5, which could explain how the virus was able to survive and  
339 pass through the stomach of the neonatal RMs [40].

340 Previously, it has been suggested that the tonsils may be a portal of viral access to  
341 susceptible immune cells after oral exposure [8,10]; however, these studies directly applied virus  
342 to the tonsils. We found very few SHIV-1157ipd3N4 infected cells in these tissues 96 hours in  
343 our bottle-fed model of oral viral exposure (**Figs 4C and 5A**). Although these data do not  
344 discount the tonsils as a potential source of initial viral entry, it suggests that this area may not be  
345 the primary or major portal of entry for initial infection and viral dissemination. It is notable that  
346 the tonsils are more similar to lymph nodes than the mucosal environment of the small and large



347 intestine. Importantly, most of the T cells in the tonsil do not express the mucosal homing  
348 receptor CCR5, which is a required co-receptor which in combination with CD4 is required for  
349 the virion to functionally fuse with the target cell membrane. The paucity of susceptible T cells  
350 (CCR5+) in the tonsils is the likely reason that we found limited numbers of SHIV-1157ipd3N4  
351 infected cells in the tonsil and oral cavity overall. In contrast, the gut contains a large number of  
352 potential SHIV-1157ipd3N4 target cells with CCR5+, CD4+ T cells being the majority  
353 population in the immune cell rich mucosal environment of the intestine. This makes the gut a  
354 rich environment for the virus to replicate which is reflected in the presented data, especially the  
355 small intestine (**Figs 4 and 5**). Considering our observations, our data suggests that the gut may  
356 represent the major portal of viral transmission after oral exposure by breastfeeding. Consistent  
357 with this possibility, the distribution of viral particles in a liquid, oral challenge rapidly reaches  
358 the stomach and intestines where there will be ample opportunity for the virus to reach and  
359 penetrate the luminal barrier of the gut. In contrast, the fluid in the inoculum will rapidly flow  
360 over the surface of the oral cavity giving less of an opportunity to penetrate the epithelial barriers  
361 of the oral cavity which is target cell poor environment. While we found the majority of SHIV-  
362 1157ipd3N4 cells in the small and large intestine, it is important to note that we cannot  
363 determine with our methods if these large foci of infection represent the initial sites of infection  
364 at the portal of transmission or a location rich in target cells that can foster high levels of viral  
365 replication after initial expansion and replication in the oral cavity. It seems the large number of  
366 expanding, substantial infectious foci in the gut most likely initiated in the gut considering the  
367 short four-day period between drinking virus containing fluid and necropsy. The efficient  
368 movement of the virus containing fluid we documented throughout the alimentary canal four  
369 hours after drinking and our ability to identify intact viral particles penetrating the intestinal

370 mucosa likewise support a model where oral exposure of virus containing fluid can utilize the  
371 intestine as a portal of transmission.

372 Another retrovirus known to be milk transmitted is the mouse mammary tumor virus  
373 (MMTV) that disseminates through the GI tract and directly infects immune cells in the Peyer's  
374 patches of the gut, suggesting that other breast milk-transmitted retroviruses may also have this  
375 capability [41,42]. Although current models of MMTV acquisition suggest that this process  
376 takes place through cell-associated virus (infected cells in milk) which could withstand the acidic  
377 pH of stomach acid better than cell-free virus [43]. However, our observations clearly  
378 demonstrate the viral particle can reach the intestinal compartment intact, without being cell  
379 associated, agreeing with previous results from Baba et. al. which demonstrated that cell-free  
380 SIV is transmitted orally in neonatal rhesus macaques [38]. Providing the challenge virus in  
381 formula may have played a role in buffering the mucosal environment slowing virion lysis and  
382 degradation. Therefore, our PET/CT and microscopy data, taken together with the knowledge  
383 that the gut is a target rich environment for viral infection is consistent with a model where the  
384 SHIV-1157ipd3N4 infected cells we found in the intestines originated from virus in the  
385 challenge inoculum utilizing the gut as the primary portal of transmission. Future experiments  
386 are required to determine the origin of the foci of infection we observed.

387 Our lab has previously shown that the reporter viral vector, LICH, allows us to locate  
388 tissues and cells that were transduced by the challenge inoculum through bioluminescence,  
389 nested PCR and fluorescent microscopy [22,31]. This technology provides us with the ability to  
390 identify cell types that are vulnerable to becoming the first cell infected in different models of  
391 HIV transmission. In our model of oral HIV transmission, we were able to use LICH to identify  
392 sites of viral transduction through the presence of mCherry DNA by PCR (**Table 1**). However,

393 locating mCherry+ cells by microscopy was arduous (**Fig 3 and Table 2**). It may be possible  
394 that, while our viral vector works well in rectal and vaginal infection models, this technology is  
395 not well suited for oral challenge. Visualizing LICH is optimal with a focal area of transduction  
396 to produce a sufficient density of photons for efficient detection. Therefore, a target poor  
397 environment like the tonsils may not be able to achieve sufficient photon flux for detection.  
398 Likewise, the particles will be greatly diluted and at low concentration to transduce cells at a  
399 density conducive to the detection of luciferase activity. Because of inefficient photons to guide  
400 our efforts to identify pieces of tissue containing foci of transduction, we decided to forgo  
401 searching for LICH transduction in subsequent animals (RM23, RM25, RM26, RM27, RM28)  
402 and proceed to identify SHIV-1157ipd3N4 infected cells. The large replicative capacity of the  
403 virus, and infectious clone engineered to contain NF- $\kappa$ B sites in the long terminal repeats [32],  
404 facilitated our ability to identify pieces of tissue containing foci of viral replication random  
405 screening.

406       Models of mother-to-child transmission that have used oral routes of inoculation utilized  
407 either dripping virus directly onto the tonsils [9,10,18,44], slowly dripping cell-free virus  
408 solution onto the back of the tongue [38] or bottle-feeding methods [18,45]. To mimic how  
409 vertical transmission occurs in humans via breastfeeding, we mixed challenge inoculums into  
410 formula, which was then bottle fed [25]. Currently, the exact dose of HIV in each exposure  
411 during breastfeeding in humans is unknown [1]. It has been shown that human breast milk viral  
412 load can range widely from a hundred copies per milliliter to millions of copies per milliliter.  
413 These studies have also shown that a high viral load in breast milk correlates to HIV  
414 transmission in human infants [46-48]. Our initial experiments were based on repeated low dose  
415 viral challenges as other studies have previously reported [18,44]. We found SHIV-1157ipd3N4

416 DNA (**Table 1**), however, viral dissemination was not as widespread as we predicted using the  
417 repeated low challenge dosing. Therefore, to better understand the mechanisms of viral  
418 dissemination after oral challenge, we increased the dose of virus in our repeated challenges to  
419 super-physiological. From these changes in experimental design, along with an increase in time  
420 point to day four post viral challenge, infected cells could be detected easily throughout the GI  
421 tract (**Figs 4, 5, and S1 and Table 3**).

422 Neonates have an immature innate and adaptive immune system that is highly  
423 metabolically active compared to adults [17], providing an optimal environment for viral  
424 replication which often results in a high viremia. We have previously observed that immature  
425 DCs are efficient targets of SIV infection after vaginal challenge [22,31]. They can also play  
426 roles in HIV/SIV transmission in other models [35-37]. However, immature DCs are not a  
427 preferential target of the SHIV-1157ipd3N4 virus utilized in this neonatal model of oral viral  
428 exposure. For example, it has previously been shown that neonates have more proliferating  
429 CD4<sup>+</sup> T cells in the small intestine than adult macaques and that these proliferating T cells are  
430 selectively infected after intravenous injection of SIVmac251 in neonates [14,15]. Similarly, our  
431 data show that T cells, specifically non-Th17 T cells, were the largest subset of infected immune  
432 cells in all tissue types analyzed after oral SHIV-1157ipd3N4 challenge (**Figs 5 and S1**).

433 However, it is important to note that we did not look further into what CD4<sup>+</sup> T cell subset makes  
434 up our “other T cell” population. This remains to be investigated in future experiments.

435 These data demonstrate that HIV virions distribute throughout and penetrate the entire GI  
436 tract at a very rapid rate hours after viral exposure. These findings were only made through use  
437 of our technologies of PET/CT coupled with a photoactivatable GFP-tagged HIV. Furthermore,  
438 we also show that the entire GI tract is susceptible to viral infection after oral viral exposure. Our

439 data indicate that the small intestine is the primary site for viral infection and that CD4+ T cells  
440 are the primary target cells 96 hours after viral exposure. Taken together, our results provide  
441 more insight to the mechanism behind acute viral infection in neonates after oral exposure.

442

## 443 **Experimental Methods**

### 444 **Ethics Statement**

445 PET/CT experiments were conducted at the New Iberia Research Center (NIRC) at the  
446 University of Louisiana at Lafayette. Studies examining LICH transduction and SHIV-  
447 1157ipd3N4 infection were conducted at the Southwest National Primate Research Center at the  
448 Texas Biomedical Research Institute (Texas Biomed), in San Antonio, Texas All procedures  
449 were approved by the Animal Care and Use Committees at Texas Biomed (IACUC: 1441 MM)  
450 and NIRC (IACUC: 2017-8791-002). All studies were performed in accordance with the  
451 recommendations in the Guide for the Care and Use of Laboratory Animals.

### 452 **Virus production**

453 To generate PA-GFP-BaL, we co-transfected the R5-tropic, R9-BaL infectious molecular  
454 clone construct with a plasmid expressing a photoactivatable GFP (PA-GFP) [49] fusion with  
455 HIV VPR (PA-GFP-VPR) as previously described [28-30]. The replication competent virus  
456 labeled with PA-GFP-VPR generated by polyethylenimine transfection of human 293T cells in  
457 DMEM medium containing 10% heat-inactivated fetal calf serum, 100U/ml penicillin, 100µg/ml  
458 streptomycin, and 2mM l-glutamine. After 24 to 48 hours, virus was harvested, filtered at 0.45  
459 µm and stored at -80°C [28]. Viral particles were concentrated and enriched by centrifugation  
460 through a sucrose cushion.

461 LICH reporter virus was produced as previously described [31]. Briefly, a SIV-based  
462 pseudovirus vector system was generated from modifications of the SIV3 vector system [50].  
463 The firefly luciferase gene is expressed through a poliovirus internal ribosome entry site (IRES)  
464 [51]. Transcription of both luciferase and mCherry are driven from the constitutive immediate-  
465 early CMV promoter and their expression is enhanced by WPRE for robust expression. LICH is  
466 produced by transfecting 293T cells with four plasmids: LICH reporter genome, SIV3+  
467 packaging vector, REV expression plasmid DM121, and JRFL envelope. Viral supernatants were  
468 collected 48 hours post-transfection, purified through 0.45µm filters, concentrated over sucrose  
469 cushions, and resuspended in PBS. Concentrated virus was stored at -80°C.

470 SHIV-1157ipd3N4 was generated as previously described [32]. Naïve RM peripheral  
471 blood mononuclear cells (PBMCs) were stimulated with concanavalin-A, followed by infection  
472 with SHIV-1157ipd3N4 that was harvested from 293T cells in the presence of human IL-2  
473 (20U/mL) and TNF-α (10ng/mL). The PBMC-derived virus stock has a p27 concentration of  
474 227ng/mL and 4x10<sup>6</sup> TCID<sub>50</sub> per mL as titrated in TZM-bl cells.

#### 475 **DOTA-labeling of virus**

476 HIV virus was DOTA-labeled as previously described [26,30]. PA-GFP-BaL was labeled  
477 with a dodecane tetraacetic acid (DOTA) chelator, which allowed for attachment of <sup>64</sup>Cu. Two  
478 buffers were prepared using a chelating resin to remove all free copper: 0.1 M sodium phosphate  
479 buffer (pH 7.3) and 0.1 M ammonium acetate buffer (pH 5.5). Chelex 100 Chelating Resin (5g,  
480 BioRad, Hercules, California) was added to 100 ml of each buffer, incubated with stirring for 1  
481 hour at room temperature, and filtered at 0.22 µm for sterilization. Concentrated virus was  
482 resuspended in PBS and a 1:10 volume of 1 M sodium bicarbonate added. DOTA-NHS-ester  
483 (Macrocylics, Dallas, Texas) was dissolved in the 0.1 M sodium phosphate buffer. The two

484 solutions were combined (0.3mg DOTA-NHS-ester per 500ng of virus, as detected by p24  
485 assay), and incubated on a rocker in the dark at room temperature. After 30 minutes, the buffer  
486 was exchanged for the 0.1 M ammonium acetate using a Zeba column 40K (Thermo Fisher  
487 Scientific, Waltham, Massachusetts), wash steps completed per manufacturer's protocol, and  
488 virus (PA-GFP-BaL-<sup>64</sup>Cu) collected and frozen for shipment to New Iberia Research Center  
489 (NIRC) at the University of Louisiana at Lafayette.

#### 490 **<sup>64</sup>Cu labeling of virus particles.**

491 A solution of <sup>64</sup>CuCl<sub>2</sub> (University of Wisconsin-Madison) was neutralized with Chelex-  
492 treated 1 M NH<sub>4</sub>OAc (Sigma) to a pH of 5.5, and an aliquot (~185MBq) incubated with DOTA-  
493 PA-GFP-BaL stock at 37°C for one hour. The sample was purified with a Zeba desalting spin  
494 column (30K MWCO, Thermo Fisher), eluted with PBS (Thermo Fisher), and labeling  
495 efficiency was evaluated. Labeled virus (10–37MBq) was mixed with unlabeled virus  
496 immediately prior to oral challenge.

#### 497 **Non-human Primate Studies: oral viral challenge**

498 In total, 14 Indian-origin rhesus macaques (*Macaca mulatta*) were used. Four animals  
499 that were used for PET/CT experiments received 2mL of PA-GFP-BaL (1,000ng/mL) + 0.25mL  
500 of PA-GFP-BaL-<sup>64</sup>Cu ((1,000ng/mL) in 2mL of Pedialyte for a total volume of a 4.25mL feeding  
501 (25). One animal was inoculated with a single dose (8mL) of LICH reporter virus and sacrificed  
502 at 96 hours to generate proof-of-principle data (**Fig. 3**). One animal was inoculated with four  
503 doses of 2mL of LICH + 3.5mL SHIV-1157ipd3N4 (8mL of LICH and 14mL of SHIV-  
504 1157ipd3N4 in total) and sacrificed at 53 hours for a low dose, early time point challenge (**Table**  
505 **1**). The remaining eight animals were challenged via eight feedings of 5mL SHIV-1157ipd3N4  
506 (for a total of 40mL of SHIV115ipd3N4 over the course of the experiment) + one dose of 8mL

507 LICH, which was included in the final feeding (**Supplemental Table 1**). All animals were  
508 inoculated with virus that was mixed with Pedialyte via oral bottle feeding. Animals were  
509 humanely sacrificed with an overdose (100mg/kg) of pentobarbital while under isoflurane  
510 anesthesia (Euthasol, Virbac, Westlake, Texas) or telazol anesthesia. For all experimental  
511 conditions, the oral mucosa, entire gastrointestinal tract, spleen, liver, trachea, lungs, and neck  
512 lymph nodes were removed. For PET/CT experiments, tissues were cut into 1-cm<sup>2</sup> pieces and  
513 frozen in optimal cutting temperature (OCT) media (Thermo Fisher Scientific). Once frozen  
514 tissue was no longer radioactive, it was shipped on dry ice to the Hope Lab at Northwestern  
515 University. For experiments examining LICH transduced and SHIV-1157ipd3N4 infected cells,  
516 samples were stored in RPMI after necropsy, and shipped on ice overnight to Northwestern  
517 University.

#### 518 **NHP studies: imaging (PET, CT, and IVIS)**

519       Animals were sedated with intramuscularly with 10mg/kg Telazol/ketamine (Zoeis,  
520 Parsippany-Troy Hills, New Jersey) and 1-3% isoflurane in 100% oxygen for the following  
521 scans. The animal's body was immobilized in dorsal recumbency in a vacuum-sealed veterinary  
522 positioner, and body temperature maintained with a warm air blanket (3M Bair hugger Model  
523 505 warming unit, Saint Paul, Minnesota) and water-circulating heating pads. In addition,  
524 respiration, movement, and mucosal coloration (PET Scanner) were visually assessed. PET/CT  
525 scans were acquired using a Philips Gemini TF64 PET/CT scanner. The final CT image was  
526 compiled from 250 to 300 slices, depending on animal size. PET-CT combined images were  
527 analyzed using MIM software. Standard uptake values were measured using the volume regions  
528 of interest (ROI) tool and compared and normalized across animals. All scans lasted 20 minutes.  
529 Initial PET scans were obtained immediately following oral viral challenge. Second scans were



530 performed one hour after oral challenge. PET scans also occurred at two and four hours for final  
531 *in vivo* tracking of radiolabeled virus. CT scans were performed immediately following the last  
532 PET scan. After sacrifice, PET images of whole tissues were taken. After tissue processing, each  
533 block was scanned and compared to a standard control for PET intensity.

534 Tissues were soaked in 100mM d-Luciferin (Biosynth) for a minimum of 10 minutes and  
535 placed in *In Vivo* Imaging System (IVIS) machine to examine luciferase activity (Figure 1B).  
536 Tissues positive for luciferase were cut into 1x1 mm<sup>2</sup> pieces and frozen in optimal cutting  
537 temperature (OCT) media for PCR and microscopy. For experiments with PA-GFP-BaL, four  
538 animals received 0.5mL <sup>64</sup>Cu-PA-GFP-BaL and unlabeled 1mL of PA-GFP-BaL in Pedialyte.  
539 Animals were humanely sacrificed with an overdose of a solution containing pentobarbital  
540 (100mg/kg) while under isoflurane anesthesia. For all experimental conditions, the oral mucosa  
541 and GI tract were removed and separated by individual tissues, mesenteric lymph nodes were  
542 separated from the colon and stored as individual lymph nodes. All tissues were frozen in  
543 optimal cutting temperature media (OCT) for microscopy.

#### 544 **Nested PCR**

545 Genomic DNA for nested PCR was isolated from frozen tissue sections embedded in  
546 OCT using the Qiagen DNeasy Blood and Tissue Kit as per the manufacturer's instructions. The  
547 initial nested PCR reactions were performed with 250ng of DNA per reaction and DreamTaq  
548 (Thermo Scientific). The second round of PCR was performed using 2ul of the first-round  
549 reaction products. For detection of L1Ch transduction, PCR was performed to identify mCherry  
550 DNA using the following primers: outside forward 5'-ACATGTGTTTAGTCGAGG-3', outside  
551 reverse 5'-CAGTCAATCTTTCACAAATTTTGTAAATCC -3', inside forward 5'-  
552 CCGACTACTTGAAGCTGTCCTT-3', and inside reverse 5'-

553 GTCTTGACCTCAGCGTCGTAGT-3'. For detection of SHIV-1157ipd3N4 infection, PCR was  
554 performed to identify gag DNA using the following primers: outside forward 5'-  
555 ATTAGCAGAAAGCCTGTTGGAG-3', outside reverse 5'-  
556 AGAGTGTCTTCTTTCCCACAA-3', inside forward 5'-  
557 CATTACGCAGAAGAGAAAGTG-3', inside reverse 5'-GGTATGGGGTTCTGTTGTCTGT-  
558 3'. Each DNA sample was tested in 12 replicates. Sequences were confirmed by extracting  
559 DNA bands using Qiagen QIAquick Gel Extraction Kit and analysis with the second-round  
560 primers.

### 561 **Fluorescent microscopy and image analysis**

562 For all imaging, twelve-to-fifteen-micron tissue sections were cut and fixed with 3.7%  
563 formaldehyde in PIPES buffer for 10 minutes at room temperature. To study distributions and  
564 localization of PA-GFP-BaL, nuclei were stained with Hoechst (1:25,000, ThermoFisher  
565 Scientific). Coverslips were mounted with DakoCytomation mounting medium (Burlington,  
566 Ontario, Canada) and sealed with nail polish. Twenty to twenty-two Z-stack images at 0.5- $\mu$ m  
567 steps were obtained by deconvolution microscopy on a DeltaVision inverted microscope (GE,  
568 Boston, Massachusetts) at 100x. The 20-22 images were taken in an unbiased manner by  
569 following the linear path of the luminal surface of the mucosa with the distance between each  
570 image dictated by bleaching caused by photoactivation. Images were analyzed with softWoRx  
571 software (Applied Precision, Issaquah, Washington). Number of total virions and penetrating  
572 virions were counted. Virions were defined by existing in more than three Z planes and the post-  
573 activation signal had to be at least three times higher than the pre-activation signal. Penetrating  
574 virions were defined by being at least 1 $\mu$ m deep into the epithelium; all penetration depths were  
575 measured in microns.

576 Tissue sections used to investigate infected cells were then washed in PBS and tissue  
577 sections were blocked in donkey serum (10% normal donkey serum, 0.1% Triton-X-100, 0.01%  
578  $\text{NaN}_3$ ) for 30 minutes at room temperature; blocking solution was used for staining buffer  
579 throughout experiment. For mCherry detection, tissue sections were stained with primary  
580 antibodies for CD3 (one drop of the prediluted antibody per 200 $\mu\text{l}$  staining buffer, clone SP7,  
581 Abcam) and HIV envelope (1:300 AG3, AIDS Reagent Repository) for two hours at room  
582 temperature. Slides were washed with PBS and then stained with secondary antibodies donkey  
583 anti-rabbit-AF488 and donkey anti-mouse-AF647 (1:1000, Jackson ImmunoResearch, West  
584 Grove, Pennsylvania) for one hour at room temperature. Nuclei were stained with Hoechst  
585 (1:25,000) for 10 minutes at room temperature. Adjacent tissue sections were stained with a  
586 primary rabbit anti-firefly luciferase (1:200, Abcam) for two hours at room temperature. Slides  
587 were washed with PBS and then stained with secondary antibodies donkey anti-rabbit-AF488  
588 (1:1000). Nuclei were stained for with Hoechst (1:25000). Coverslips were mounted with  
589 DakoCytomation mounting medium and sealed with nail polish. Images were taken in 3x5 Z-  
590 stack panels at 0.5 $\mu\text{m}$  steps for 30 steps by deconvolution microscopy on a DeltaVision inverted  
591 microscope (GE) at 60x. Images were analyzed with softWoRx software (Applied Precision,  
592 Issaquah, Washington). Upon finding cells that appeared to be mCherry+, location of the cells  
593 was recorded, and sections were marked. Slides were then taken to an A1R-Spectral confocal  
594 microscope (Nikon, Tokyo, Japan) to analyze the emission spectra of the previously found cells  
595 compared to the known emission spectra of mCherry at 610nm. Images were analyzed with NIS  
596 Elements-C software (Nikon).

597 To phenotype of SHIV-1157ipd3N4 infected cells, slides were stained with primary  
598 antibodies for CD3 (one drop of the prediluted antibody per 200 $\mu\text{l}$  staining buffer, clone SP7,

599 Abcam) and HIV envelope (1:300 AG3, AIDS Reagent Repository) for two hours at room  
600 temperature. Slides were washed with PBS and then stained with secondary antibodies donkey  
601 anti-rabbit-AF488 and donkey anti-mouse-AF594 (1:1000, Jackson ImmunoResearch) for one  
602 hour at room temperature. Tissue sections were then washed and stained with an AF647-directly  
603 conjugated antibody towards CCR6 (1:200, clone G034E3, BioLegend) at 37°C for one hour.  
604 Nuclei were stained for with Hoechst (1:25000). Coverslips were mounted with DakoCytomation  
605 mounting medium and sealed with nail polish. Image panels containing 30 sections in the Z  
606 plane at 0.5um steps were taken and deconvoluted with softWoRx software on a DeltaVision  
607 inverted microscope. Five 40x images were taken for each sample. Each image consisted of a  
608 stitched panel of three 40x images by 5 40x images to include the epithelium. Infected cells were  
609 counted, cell phenotypes were identified (T cells – CD3<sup>+</sup>, Th17 cells – CD3<sup>+</sup> CCR6<sup>+</sup>, immature  
610 dendritic cells – CD3<sup>-</sup>, CCR6<sup>+</sup>, and other – CD3<sup>-</sup>, CCR6<sup>-</sup>), and cell subsets were recorded as  
611 parts of a whole (100%).

## 612 **Statistical Analysis**

613 All statistical analyses were performed using R version 4.0.2. To perform group comparisons per  
614 necropsy time, different mixed-effects models were fitted separately for the 2- and 4-hour  
615 necropsy animals. For each dataset, we used the best fitting model depending on the nature of the  
616 data analyzed. We always included animal as a random effect in the models. Virion counts per  
617 necropsy time were modeled using a negative binomial generalized mixed model to test for  
618 differences between anatomical locations, controlling for the number of images taken per animal  
619 and tissue. For this dataset we also tested zero-inflated negative binomial models due to the high  
620 number of zeros observed in some anatomical regions, but these models did not significantly  
621 improve the performance of the negative binomial model. To test for differences in number of

622 penetrating virions present in the different anatomical locations per necropsy time, we  
623 transformed the penetrating depth data into a binary categorical variable by considering  
624 penetrating virions as those deeper than one micron from the epithelial surface data, while  
625 defining the rest as non-penetrating virions. We subsequently fitted a binomial generalized linear  
626 mixed-effects model including the anatomical location as the predictor variable, controlling for  
627 the number of images taken per tissue and animal. Finally, we tested for differences in  
628 penetrating depth among virions considered as penetrating by the previous definition between the  
629 different anatomical locations. We used a linear mixed effects model, also controlling for  
630 number of images. We performed all possible contrasts within each of the models, adjusting the  
631 false discovery rate for multiple comparisons using Benjamini-Hochberg Procedure. A false  
632 discovery rate (FDR) significance cut-off was set at  $FDR < 0.05$  for every comparison.

633 **Acknowledgements:** Thanks to the research and animal care teams at Texas Biomed and NIRC.  
634 Thank you to Danijela Maric and Katarina Kotnik Halavaty for instruction on experimental  
635 techniques.

## 636 **References**

- 637 1. Abel K. The rhesus macaque pediatric SIV infection model - a valuable tool in  
638 understanding infant HIV-1 pathogenesis and for designing pediatric HIV-1 prevention strategies.  
639 *Current HIV research*. 2009;7(1):2-11.
- 640 2. Iliff PJ, Piwoz EG, Tavengwa NV, Zunguza CD, Marinda ET, Nathoo KJ, et al. Early  
641 exclusive breastfeeding reduces the risk of postnatal HIV-1 transmission and increases HIV-free  
642 survival. *AIDS (London, England)*. 2005;19(7):699-708.

- 643 3. Kuhn L, Sinkala M, Kankasa C, Semrau K, Kasonde P, Scott N, et al. High uptake of  
644 exclusive breastfeeding and reduced early post-natal HIV transmission. *PloS one*.  
645 2007;2(12):e1363.
- 646 4. Overbaugh J. Mother-infant HIV transmission: do maternal HIV-specific antibodies  
647 protect the infant? *PLoS pathogens*. 2014;10(8):e1004283.
- 648 5. Gaur AH, Dominguez KL, Kalish ML, Rivera-Hernandez D, Donohoe M, Brooks JT, et  
649 al. Practice of feeding pre-masticated food to infants: a potential risk factor for HIV transmission.  
650 *Pediatrics*. 2009;124(2):658-66.
- 651 6. Ivy W, 3rd, Dominguez KL, Rakhmanina NY, Iuliano AD, Danner SP, Borkowf CB, et al.  
652 Premastication as a route of pediatric HIV transmission: case-control and cross-sectional  
653 investigations. *Journal of acquired immune deficiency syndromes (1999)*. 2012;59(2):207-12.
- 654 7. Van Rompay KK, Greenier JL, Cole KS, Earl P, Moss B, Steckbeck JD, et al.  
655 Immunization of newborn rhesus macaques with simian immunodeficiency virus (SIV) vaccines  
656 prolongs survival after oral challenge with virulent SIVmac251. *Journal of virology*.  
657 2003;77(1):179-90.
- 658 8. Stahl-Hennig C, Steinman RM, Tenner-Racz K, Pope M, Stolte N, Matz-Rensing K, et al.  
659 Rapid infection of oral mucosal-associated lymphoid tissue with simian immunodeficiency virus.  
660 *Science*. 1999;285(5431):1261-5.
- 661 9. Milush JM, Stefano-Cole K, Schmidt K, Durudas A, Pandrea I, Sodora DL. Mucosal innate  
662 immune response associated with a timely humoral immune response and slower disease  
663 progression after oral transmission of simian immunodeficiency virus to rhesus macaques. *Journal*  
664 *of virology*. 2007;81(12):6175-86.

- 665 10. Milush JM, Kosub D, Marthas M, Schmidt K, Scott F, Wozniakowski A, et al. Rapid  
666 dissemination of SIV following oral inoculation. *AIDS (London, England)*. 2004;18(18):2371-80.
- 667 11. Amedee AM, Phillips B, Jensen K, Robichaux S, Lacour N, Burke M, et al. Early Sites of  
668 Virus Replication After Oral SIVmac251 Infection of Infant Macaques: Implications for  
669 Pathogenesis. *AIDS research and human retroviruses*. 2018;34(3):286-99.
- 670 12. Douek DC, Brenchley JM, Betts MR, Ambrozak DR, Hill BJ, Okamoto Y, et al. HIV  
671 preferentially infects HIV-specific CD4+ T cells. *Nature*. 2002;417(6884):95-8.
- 672 13. Kou J, Kuang YQ. Mutations in chemokine receptors and AIDS. *Progress in molecular  
673 biology and translational science*. 2019;161:113-24.
- 674 14. Wang X, Rasmussen T, Pahar B, Poonia B, Alvarez X, Lackner AA, et al. Massive  
675 infection and loss of CD4+ T cells occurs in the intestinal tract of neonatal rhesus macaques in  
676 acute SIV infection. *Blood*. 2007;109(3):1174-81.
- 677 15. Wang X, Xu H, Pahar B, Alvarez X, Green LC, Dufour J, et al. Simian immunodeficiency  
678 virus selectively infects proliferating CD4+ T cells in neonatal rhesus macaques. *Blood*.  
679 2010;116(20):4168-74.
- 680 16. Jaspan HB, Lawn SD, Safrit JT, Bekker LG. The maturing immune system: implications  
681 for development and testing HIV-1 vaccines for children and adolescents. *AIDS (London,  
682 England)*. 2006;20(4):483-94.
- 683 17. Simon AK, Hollander GA, McMichael A. Evolution of the immune system in humans from  
684 infancy to old age. *Proc Biol Sci*. 2015;282(1821):20143085.
- 685 18. Abel K, Pahar B, Van Rompay KK, Fritts L, Sin C, Schmidt K, et al. Rapid virus  
686 dissemination in infant macaques after oral simian immunodeficiency virus exposure in the  
687 presence of local innate immune responses. *Journal of virology*. 2006;80(13):6357-67.

- 688 19. Thome JJ, Bickham KL, Ohmura Y, Kubota M, Matsuoka N, Gordon C, et al. Early-life  
689 compartmentalization of human T cell differentiation and regulatory function in mucosal and  
690 lymphoid tissues. *Nature medicine*. 2016;22(1):72-7.
- 691 20. Rudd BD. Neonatal T Cells: A Reinterpretation. *Annual review of immunology*.  
692 2020;38:229-47.
- 693 21. Bixler SL, Mattapallil JJ. Loss and dysregulation of Th17 cells during HIV infection.  
694 *Clinical & developmental immunology*. 2013;2013:852418.
- 695 22. Stieh DJ, Matias E, Xu H, Fought AJ, Blanchard JL, Marx PA, et al. Th17 Cells Are  
696 Preferentially Infected Very Early after Vaginal Transmission of SIV in Macaques. *Cell host &*  
697 *microbe*. 2016;19(4):529-40.
- 698 23. Hartigan-O'Connor DJ, Abel K, McCune JM. Suppression of SIV-specific CD4+ T cells  
699 by infant but not adult macaque regulatory T cells: implications for SIV disease progression. *The*  
700 *Journal of experimental medicine*. 2007;204(11):2679-92.
- 701 24. D'Ettorre G, Borrazzo C, Pinacchio C, Santinelli L, Cavallari EN, Statzu M, et al. Increased  
702 IL-17 and/or IFN-gamma producing T cell subsets in gut mucosa of long-term treated HIV-1-  
703 infected women. *AIDS (London, England)*. 2019.
- 704 25. Van Rompay KK, Abel K, Lawson JR, Singh RP, Schmidt KA, Evans T, et al. Attenuated  
705 poxvirus-based simian immunodeficiency virus (SIV) vaccines given in infancy partially protect  
706 infant and juvenile macaques against repeated oral challenge with virulent SIV. *Journal of acquired*  
707 *immune deficiency syndromes (1999)*. 2005;38(2):124-34.
- 708 26. Santangelo PJ, Rogers KA, Zurla C, Blanchard EL, Gumber S, Strait K, et al. Whole-body  
709 immunoPET reveals active SIV dynamics in viremic and antiretroviral therapy-treated macaques.  
710 *Nat Methods*. 2015;12(5):427-32.



- 711 27. Xie H, Wang ZJ, Bao A, Goins B, Phillips WT. In vivo PET imaging and biodistribution  
712 of radiolabeled gold nanoshells in rats with tumor xenografts. *Int J Pharm.* 2010;395(1-2):324-30.
- 713 28. Carias AM, McCoombe S, McRaven M, Anderson M, Galloway N, Vandergrift N, et al.  
714 Defining the interaction of HIV-1 with the mucosal barriers of the female reproductive tract.  
715 *Journal of virology.* 2013;87(21):11388-400.
- 716 29. McDonald D, Vodicka MA, Lucero G, Svitkina TM, Borisy GG, Emerman M, et al.  
717 Visualization of the intracellular behavior of HIV in living cells. *The Journal of cell biology.*  
718 2002;159(3):441-52.
- 719 30. Taylor RA, Xiao S, Carias AM, McRaven MD, Thakkar DN, Araínga M, et al. PET/CT  
720 targeted tissue sampling reveals virus specific dIgA can alter the distribution and localization of  
721 HIV after rectal exposure. *PLoS pathogens.* 2021;17(6):e1009632.
- 722 31. Stieh DJ, Maric D, Kelley ZL, Anderson MR, Hattaway HZ, Beilfuss BA, et al. Vaginal  
723 challenge with an SIV-based dual reporter system reveals that infection can occur throughout the  
724 upper and lower female reproductive tract. *PLoS pathogens.* 2014;10(10):e1004440.
- 725 32. Song RJ, Chenine AL, Rasmussen RA, Ruprecht CR, Mirshahidi S, Grisson RD, et al.  
726 Molecularly cloned SHIV-1157ipd3N4: a highly replication- competent, mucosally transmissible  
727 R5 simian-human immunodeficiency virus encoding HIV clade C Env. *Journal of virology.*  
728 2006;80(17):8729-38.
- 729 33. Tenner-Racz K, Stahl Hennig C, Uberla K, Stoiber H, Ignatius R, Heeney J, et al. Early  
730 protection against pathogenic virus infection at a mucosal challenge site after vaccination with  
731 attenuated simian immunodeficiency virus. *Proceedings of the National Academy of Sciences of*  
732 *the United States of America.* 2004;101(9):3017-22.

- 733 34. Veazey RS, Lifson JD, Pandrea I, Purcell J, Piatak M, Jr., Lackner AA. Simian  
734 immunodeficiency virus infection in neonatal macaques. *Journal of virology*. 2003;77(16):8783-  
735 92.
- 736 35. Holl V, Xu K, Peressin M, Lederle A, Biedma ME, Delaporte M, et al. Stimulation of HIV-  
737 1 replication in immature dendritic cells in contact with primary CD4 T or B lymphocytes. *Journal*  
738 *of virology*. 2010;84(9):4172-82.
- 739 36. Hu J, Miller CJ, O'Doherty U, Marx PA, Pope M. The dendritic cell-T cell milieu of the  
740 lymphoid tissue of the tonsil provides a locale in which SIV can reside and propagate at chronic  
741 stages of infection. *AIDS research and human retroviruses*. 1999;15(14):1305-14.
- 742 37. Wiley RD, Gummuluru S. Immature dendritic cell-derived exosomes can mediate HIV-1  
743 trans infection. *Proceedings of the National Academy of Sciences of the United States of America*.  
744 2006;103(3):738-43.
- 745 38. Baba TW, Koch J, Mittler ES, Greene M, Wyand M, Penninck D, et al. Mucosal infection  
746 of neonatal rhesus monkeys with cell-free SIV. *AIDS research and human retroviruses*.  
747 1994;10(4):351-7.
- 748 39. Marthas ML, van Rompay KK, Otsyula M, Miller CJ, Canfield DR, Pedersen NC, et al.  
749 Viral factors determine progression to AIDS in simian immunodeficiency virus-infected newborn  
750 rhesus macaques. *Journal of virology*. 1995;69(7):4198-205.
- 751 40. Miclat NN, Hodgkinson R, Marx GF. Neonatal gastric pH. *Anesth Analg*. 1978;57(1):98-  
752 101.
- 753 41. Dudley JP, Golovkina TV, Ross SR. Lessons Learned from Mouse Mammary Tumor Virus  
754 in Animal Models. *Ilar j*. 2016;57(1):12-23.

- 755 42. Ross SR. Mouse mammary tumor virus molecular biology and oncogenesis. *Viruses*.  
756 2010;2(9):2000-12.
- 757 43. Wood LF, Chahroudi A, Chen HL, Jaspan HB, Sodora DL. The oral mucosa immune  
758 environment and oral transmission of HIV/SIV. *Immunological reviews*. 2013;254(1):34-53.
- 759 44. Durudas A, Chen HL, Gasper MA, Sundaravaradan V, Milush JM, Silvestri G, et al.  
760 Differential innate immune responses to low or high dose oral SIV challenge in Rhesus macaques.  
761 *Current HIV research*. 2011;9(5):276-88.
- 762 45. Van Rompay KK, Schmidt KA, Lawson JR, Singh R, Bischofberger N, Marthas ML.  
763 Topical administration of low-dose tenofovir disoproxil fumarate to protect infant macaques  
764 against multiple oral exposures of low doses of simian immunodeficiency virus. *The Journal of*  
765 *infectious diseases*. 2002;186(10):1508-13.
- 766 46. Ndirangu J, Viljoen J, Bland RM, Danaviah S, Thorne C, Van de Perre P, et al. Cell-free  
767 (RNA) and cell-associated (DNA) HIV-1 and postnatal transmission through breastfeeding. *PloS*  
768 *one*. 2012;7(12):e51493.
- 769 47. Rousseau CM, Nduati RW, Richardson BA, Steele MS, John-Stewart GC, Mbori-Ngacha  
770 DA, et al. Longitudinal analysis of human immunodeficiency virus type 1 RNA in breast milk and  
771 of its relationship to infant infection and maternal disease. *The Journal of infectious diseases*.  
772 2003;187(5):741-7.
- 773 48. Willumsen JF, Filteau SM, Coutoudis A, Newell ML, Rollins NC, Coovadia HM, et al.  
774 Breastmilk RNA viral load in HIV-infected South African women: effects of subclinical mastitis  
775 and infant feeding. *AIDS (London, England)*. 2003;17(3):407-14.
- 776 49. Patterson GH, Lippincott-Schwartz J. A photoactivatable GFP for selective photolabeling  
777 of proteins and cells. *Science*. 2002;297(5588):1873-7.

778 50. Nègre D, Mangeot PE, Duisit G, Blanchard S, Vidalain PO, Leissner P, et al.  
779 Characterization of novel safe lentiviral vectors derived from simian immunodeficiency virus  
780 (SIVmac251) that efficiently transduce mature human dendritic cells. *Gene Ther.*  
781 2000;7(19):1613-23.

782 51. Rabinovich BA, Ye Y, Etto T, Chen JQ, Levitsky HI, Overwijk WW, et al. Visualizing  
783 fewer than 10 mouse T cells with an enhanced firefly luciferase in immunocompetent mouse  
784 models of cancer. *Proceedings of the National Academy of Sciences of the United States of*  
785 *America.* 2008;105(38):14342-6.

786 **Fig 1: PET imaging follows distribution of PA-BaL-<sup>64</sup>Cu after oral viral challenge** Four  
787 animals were orally challenged with PA-GFP-BaL-<sup>64</sup>Cu. Two animals were sacrificed two hours  
788 post challenge and another two four hours post challenge, and the oral cavity and entire GI tract  
789 removed in one piece. The tissues were cut into pieces, frozen, cryosectioned, and prepared for  
790 fluorescent microscopy. **A,B)** Representative PET images of neonates after oral viral challenge  
791 with PA-GFP-BaL-<sup>64</sup>Cu. Scale in Standard Uptake Value (SUV) **(A)** Whole body PET images at  
792 two and four hours post-oral challenge. **B)** PET image overlaid on photograph of 25 individual  
793 tissue blocks from oral mucosa and GI tract four hours post-challenge. **C)** Representative  
794 fluorescent microscopy image showing individual HIV virions (red puncta indicated by white  
795 arrows) penetrating the tongue of an animal that received PA-BaL-<sup>64</sup>Cu at two hours post-  
796 challenge. Green – pre-activation, Red – post-activation (virion), Blue – Hoechst

797  
798 **Fig 2: HIV virions distribute throughout and penetrate the mucosal epithelium of the**  
799 **entire GI tract four hours post-oral challenge** Whole GI tracts were excised and imaged by  
800 PET at two- and four-hours following necropsy. PET images overlaid on photographs allow for

801 visualization of radioactivity throughout the GI tract at two hours (A-B) and four hours (C-D)  
802 post challenge. White dotted lines depict where the GI tracts were dichotomized into upper  
803 (esophagus and stomach) and lower (small and large intestines) regions. Quantification of virions  
804 and viral penetration in the oral cavity, upper GI tract, and lower GI tract mucosa two and four  
805 hours after oral viral challenge. E) Total number of virions counted in images. Means of the  
806 virion count per group shown on stacked bars in white numbers. F) Frequency of total virions  
807 counted. G) Quantification of the number of penetrating virions. Circle area represents the  
808 number of virions. H) Virion penetration depth in microns. Each virion depth was truncated to  
809 integer numbers for representation purposes. Circle area represents the number of virions with  
810 the same depth value. Blue: two hours, Red: four hours

811

812 **Fig 3: Detection of LICH transduced cells after oral challenge** Eight animals were orally  
813 challenged with LICH and SHIV-1157ipd3N4 and sacrificed at 96 hours. Tissues were dissected,  
814 analyzed by IVIS, frozen and tissue blocks with high luciferase activity were cryosectioned.  
815 Representative fluorescent microscopy images. A) Images of neonatal tissue showing luciferase  
816 activity on IVIS B) Image of LICH transduced cell (Cell 2) in the tongue of RM22. Cell 2  
817 indicates a possible mCherry+ cell, Cell 1 indicates a neighboring cell with red background  
818 signal. Red – mCherry, green – CD3, Blue – Hoechst. 40x panel, scale bar is 30 µm C) Spectral  
819 imaging confirms mCherry signal in Cell 2 by comparison to known mCherry spectral emission.  
820 Green – Cell 1, Red – Cell 2, Blue – known mCherry emission D) Image of tongue showing no  
821 luciferase staining or mCherry label, suggesting LICH may not be sufficient in determining first  
822 cell infected in neonate oral challenge model. Red – mCherry, green – luciferase, Blue –  
823 Hoechst. 40x panel, scale bar is 30µm

824

825 **Fig 4: The majority of SHIV-1157ipd3N4 infected cells are found in the small intestine 96**

826 **hours after oral challenge.** Fluorescent microscopy and quantification of SHIV-1157ipd3N4

827 infected cells from eight animals that were sacrificed at 96 hours after dual viral oral challenge.

828 Tissues were dissected, analyzed by IVIS, frozen, and tissue blocks with high luciferase activity

829 were cryosectioned. Slides were stained for CD3, CCR6, AG3, and Hoechst. Representative

830 fluorescent microscopy images. **A-B)** Cryosections of the small intestine showing SHIV-

831 1157ipd3N4 infected cells **A)** 40X panels, scale bars 60 microns **B)** 100x panels, scale bars 20

832 microns **C)** Quantification of total number of SHIV-1157ipd3N4 infected cells by tissue type.

833 Each dot represents the total number of cells found in five 40x panels in one individual animal

834

835 **Fig 5: The majority of SHIV-1157ipd3N4 infected cells are T cells at 96 hours after oral**

836 **challenge** Quantification of SHIV-1157ipd3N4 infected cells found in the oral cavity and GI

837 tract of animals examined in Figures 4-5. Graphs depict the percentage of infected cell types

838 identified by fluorescent microscopy as parts of a whole. Total cell counts were taken in five 40x

839 panels in every animal. **A)** Total number of infected cells in all eight neonatal RMs in tongue,

840 tonsil, esophagus, stomach, small intestine, and large intestine. **B)** Total number of infected cell

841 phenotypes in all eight RMs in the stomach, small intestine, and large intestine. Infected cell

842 types were categorized as five cell types: T cells (CD3+), TH17 T cells (CD3+, CCR6+), other T

843 cells (CD3+, CCR6-), Immature DCs (CD3-, CCR6+), Other (CD3-, CCR6-).

844

845 **S1 Fig: Phenotype of SHIV-1157ipd3N4 infected cells in neonatal RM after oral viral**

846 **exposure** Quantification of SHIV-1157ipd3N4 infected cells found in the GI tract of each animal

847 examined in Figures 4-5. Graphs depict the percentage of infected cell types as parts of a whole  
848 in each individual animal identified by fluorescent microscopy. Infected cell types were  
849 categorized as five cell types: T cells (CD3+), TH17 T cells (CD3+, CCR6+), other T cells  
850 (CD3+, CCR6-), Immature DCs (CD3-, CCR6+), Other (CD3-, CCR6-). Total cell counts were  
851 taken in five 40x panels in every animal.

852

853 **Table 1: Distribution of LICH transduction and SHIV-1157ipd3N4 DNA throughout the GI**  
854 **tract after oral challenge** LICH viral vector mainly found in the tongue after oral challenge.  
855 SHIV-1157ipd3N4 viral dissemination found throughout the GI tract after oral challenge. +  
856 indicates mCherry DNA found; # indicates gag DNA found

857 **Table 2: Localization of LICH transduced cells at 96 hours post oral challenge by**  
858 **microscopy** LICH transduced cells found in the tongue, trachea, and stomach 96 hours after oral  
859 challenge by microscopy. Cells were validated by spectral imaging. + indicates mCherry DNA  
860 found

861 **Table 3: Localization of SHIV-1157ipd3N4 infected cells 96 hours after oral challenge by**  
862 **microscopy** SHIV-1157ipd3N4 viral dissemination found throughout the GI tract after oral  
863 challenge. + indicates AG3+ cells found by microscopy, NA indicates mesenteric lymph nodes  
864 were not collected from this animal

865 **S1 Table: Identification of neonatal rhesus macaques used in LICH and SHIV-1157ipd3N4**  
866 **studies** \*Day of harvest, date of harvest, initials of scientists who grew virus listed



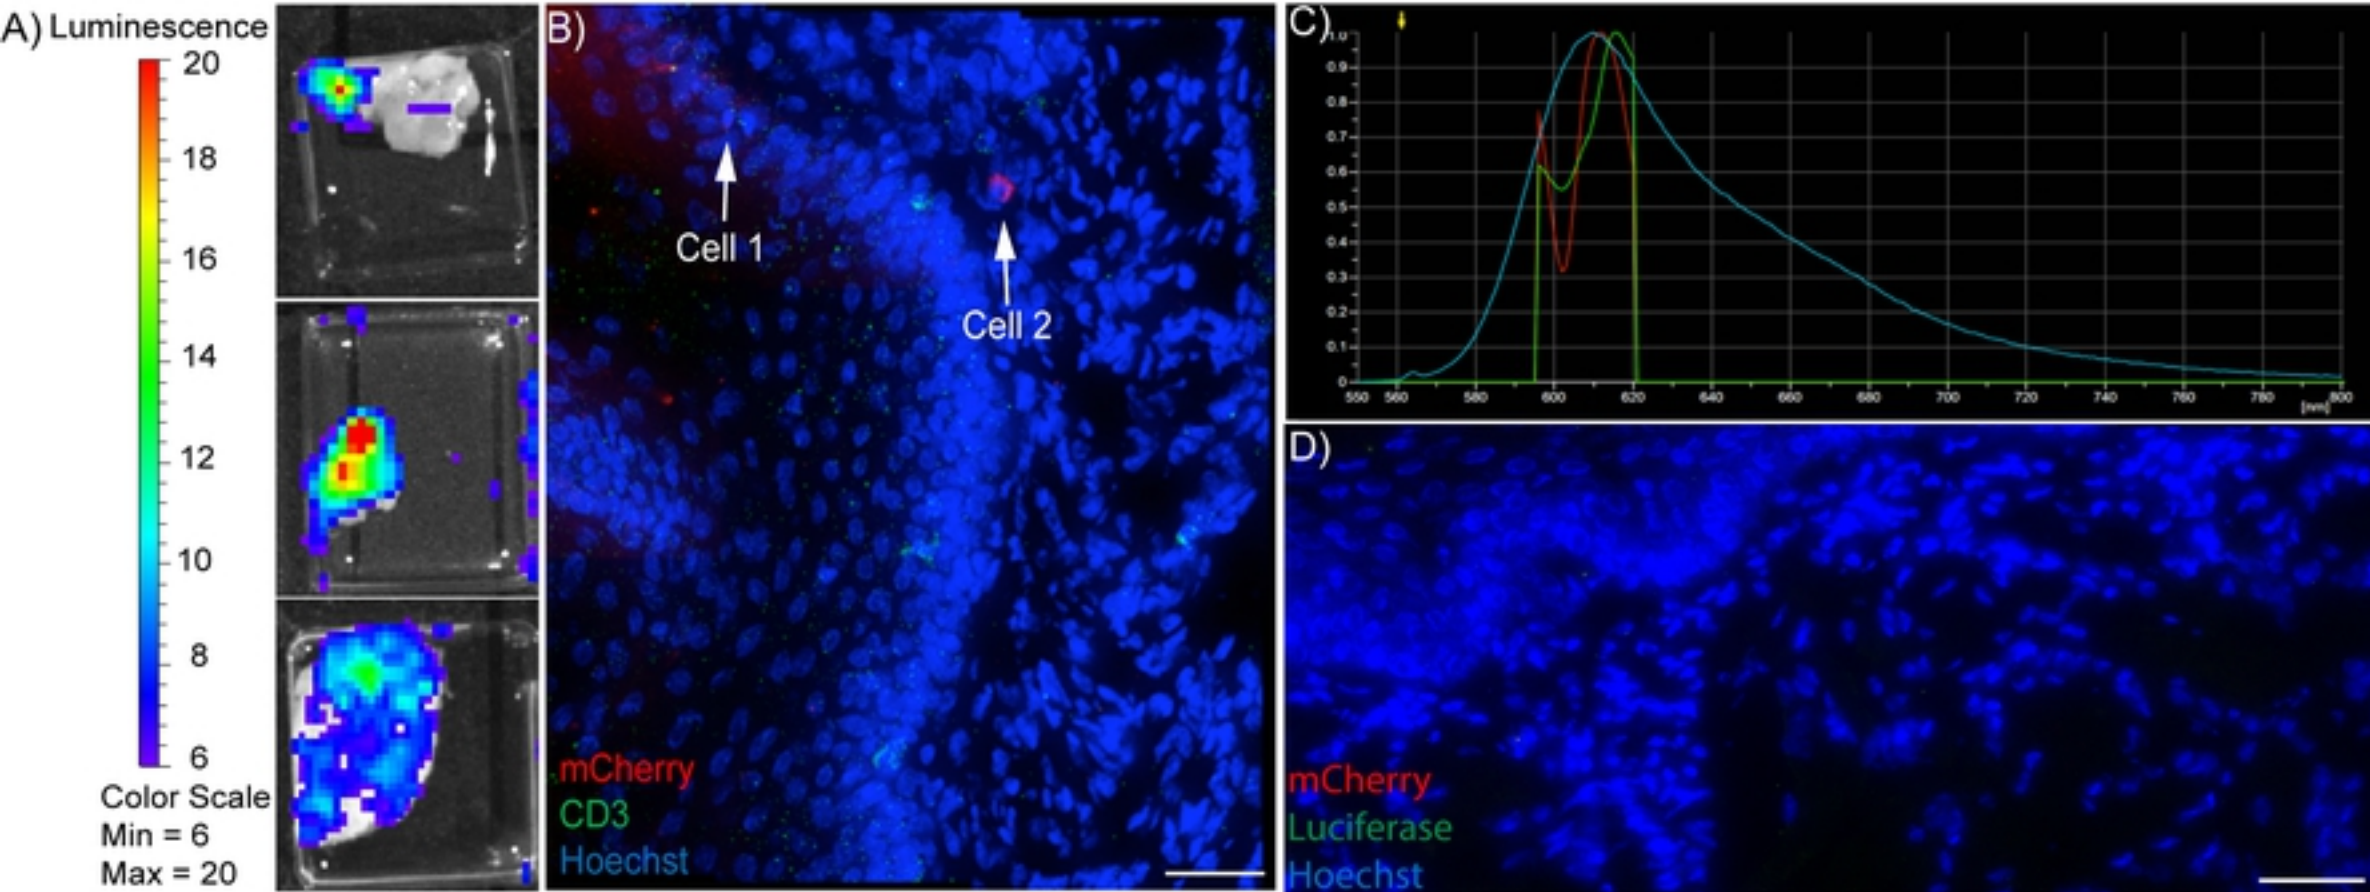

Fig3



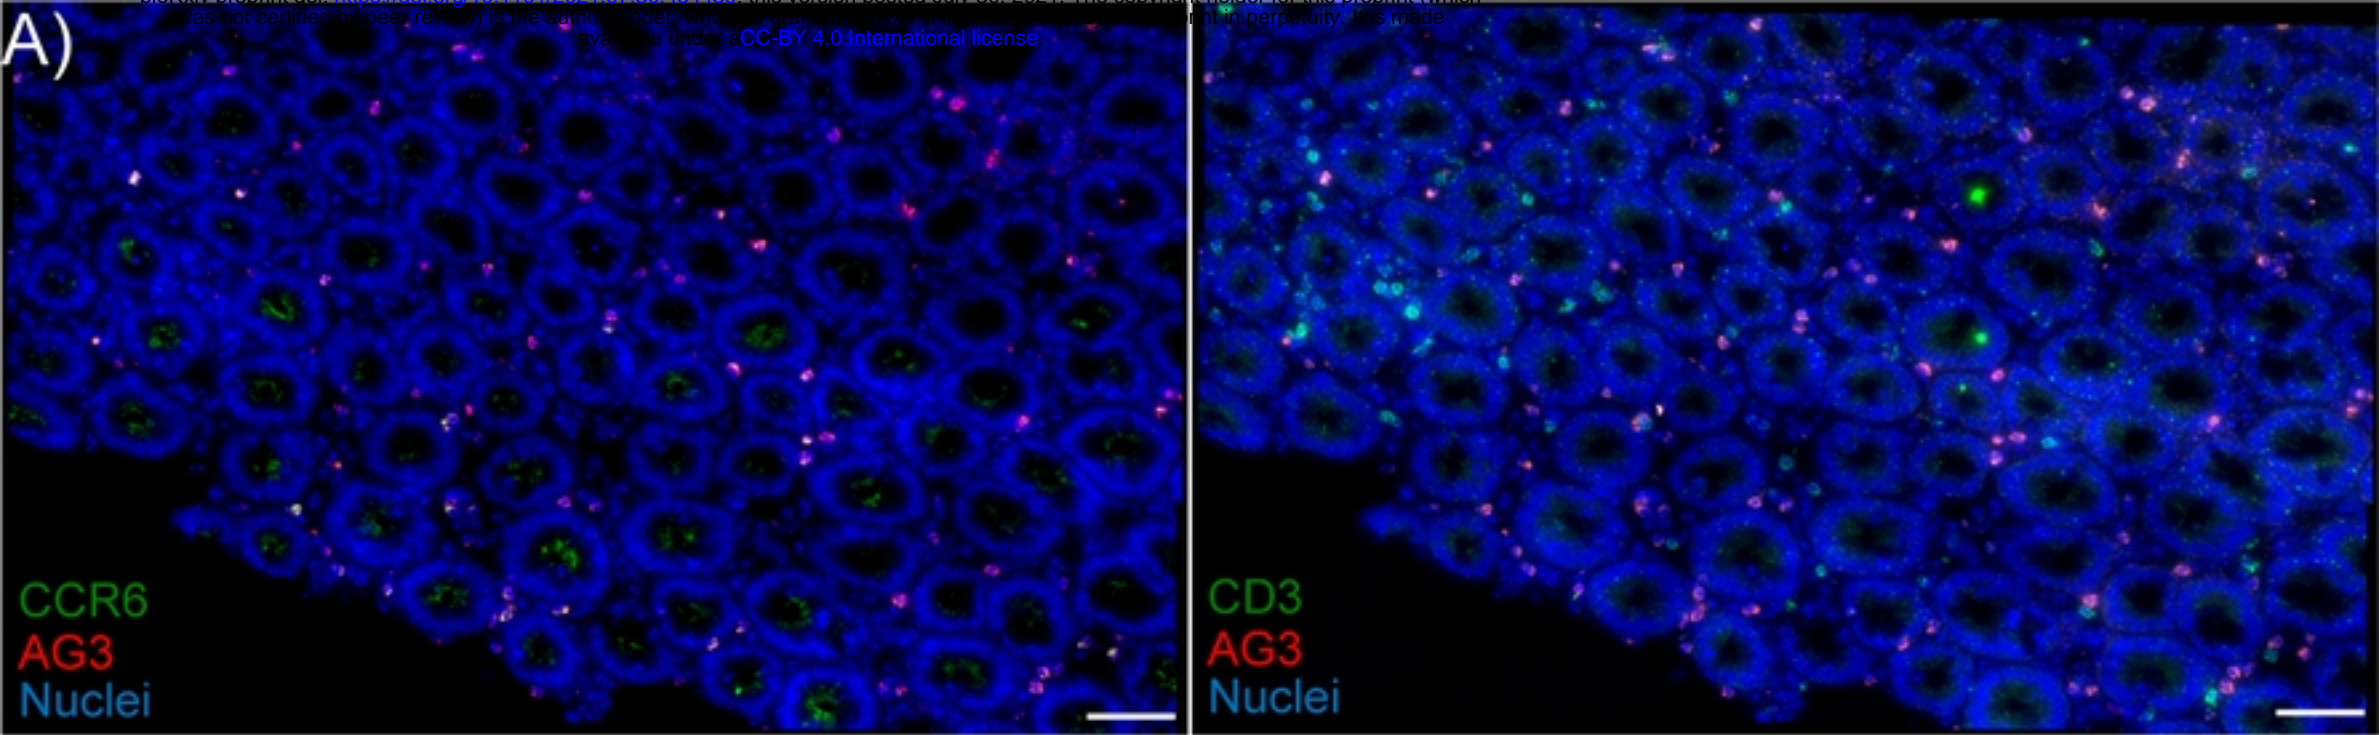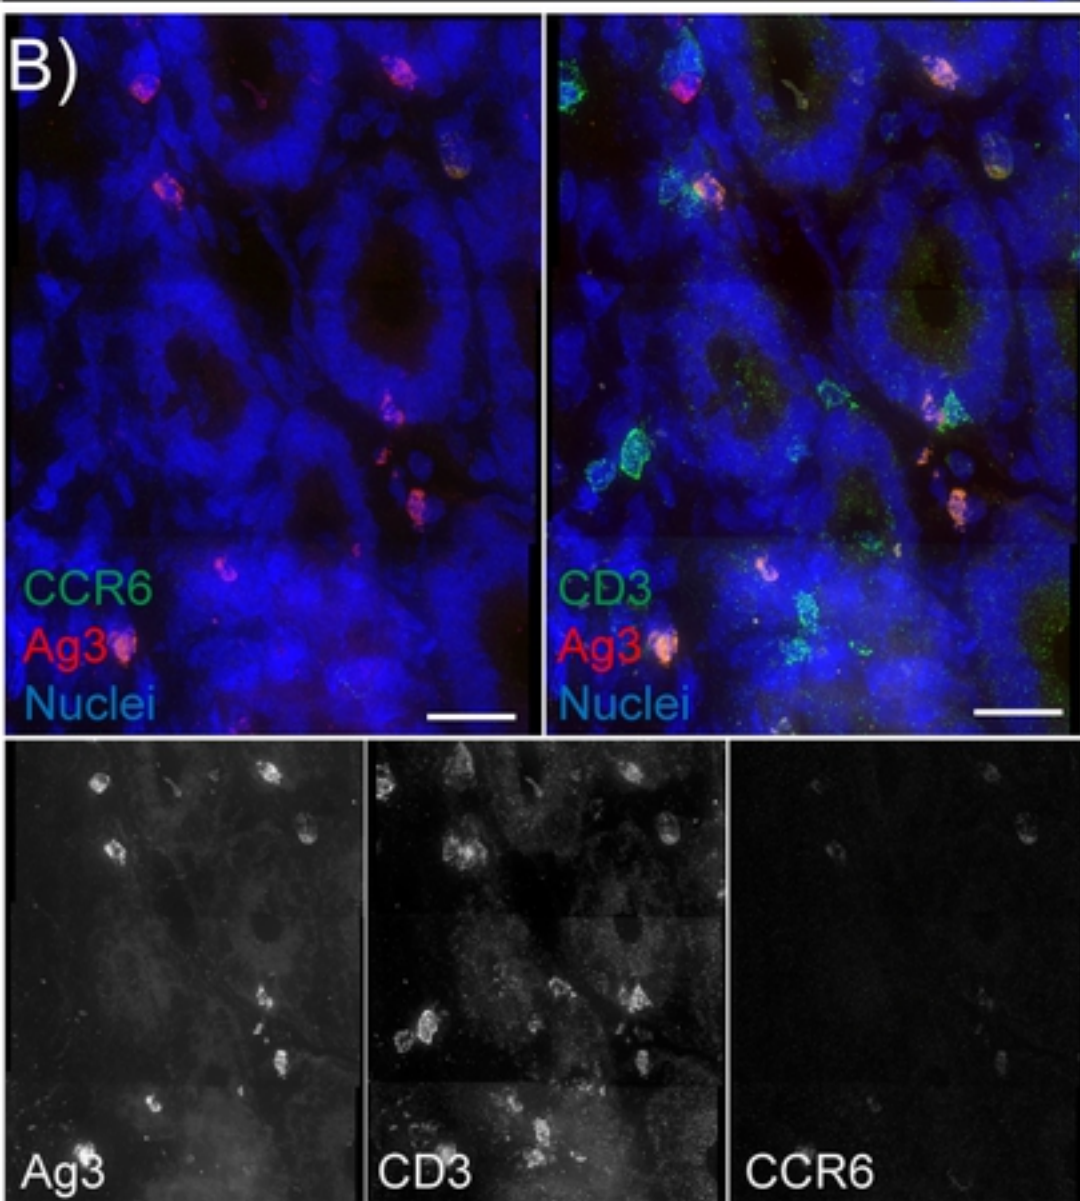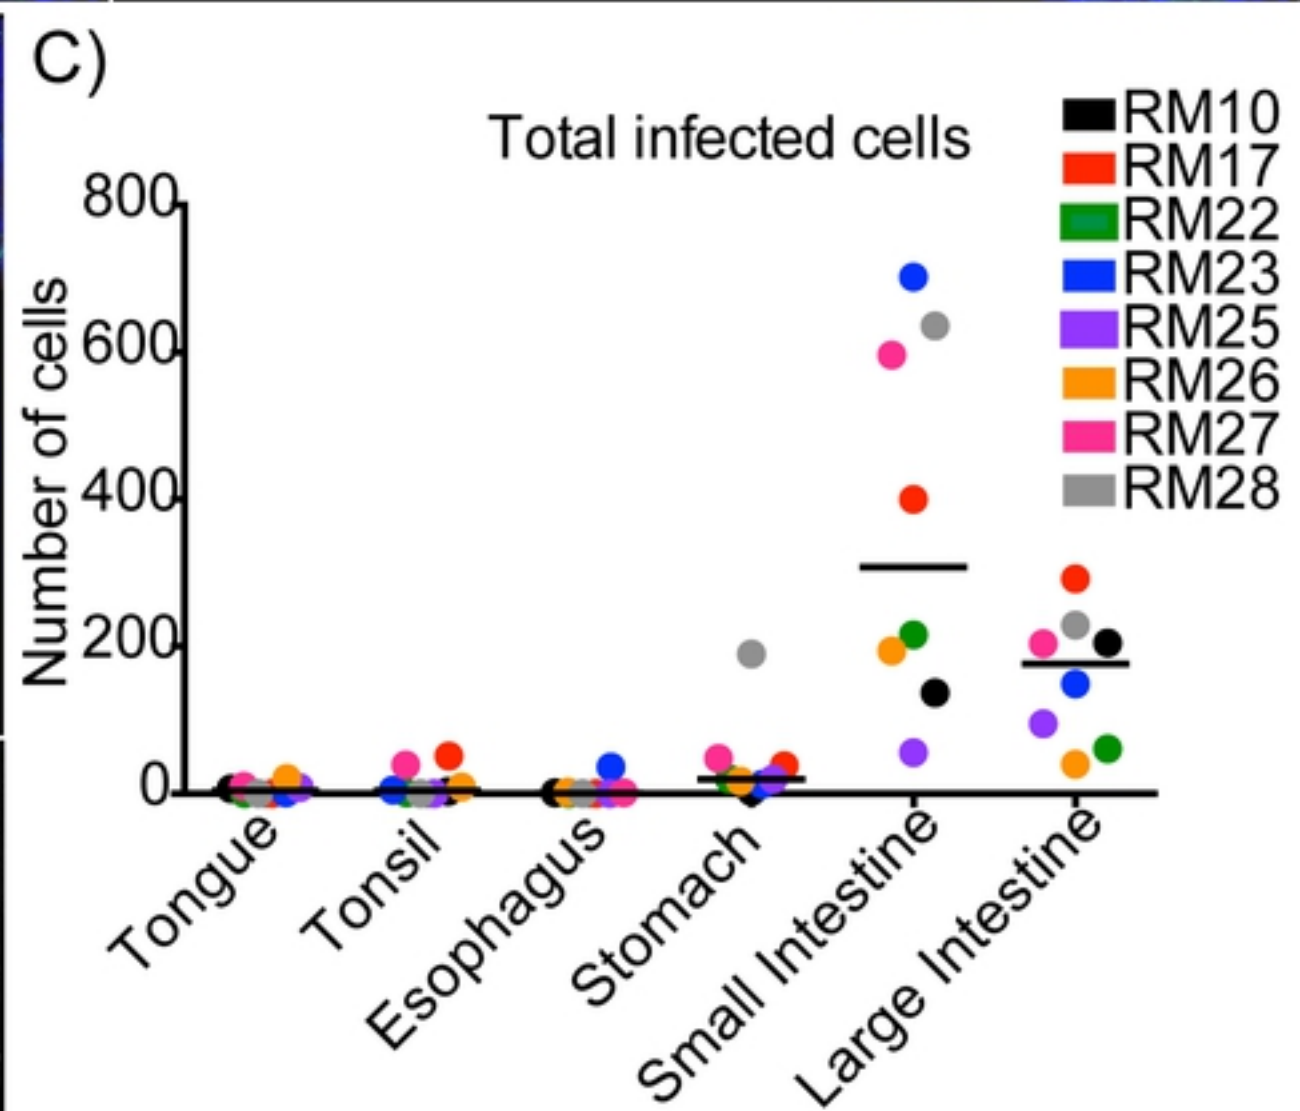

Fig4

A)

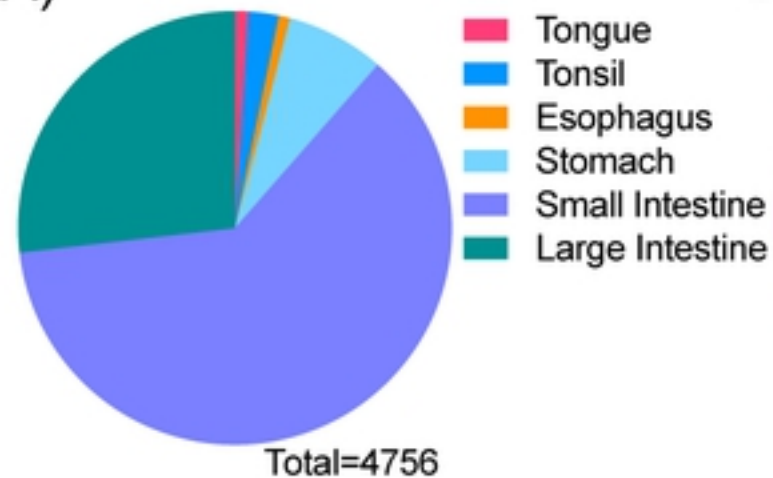

B)

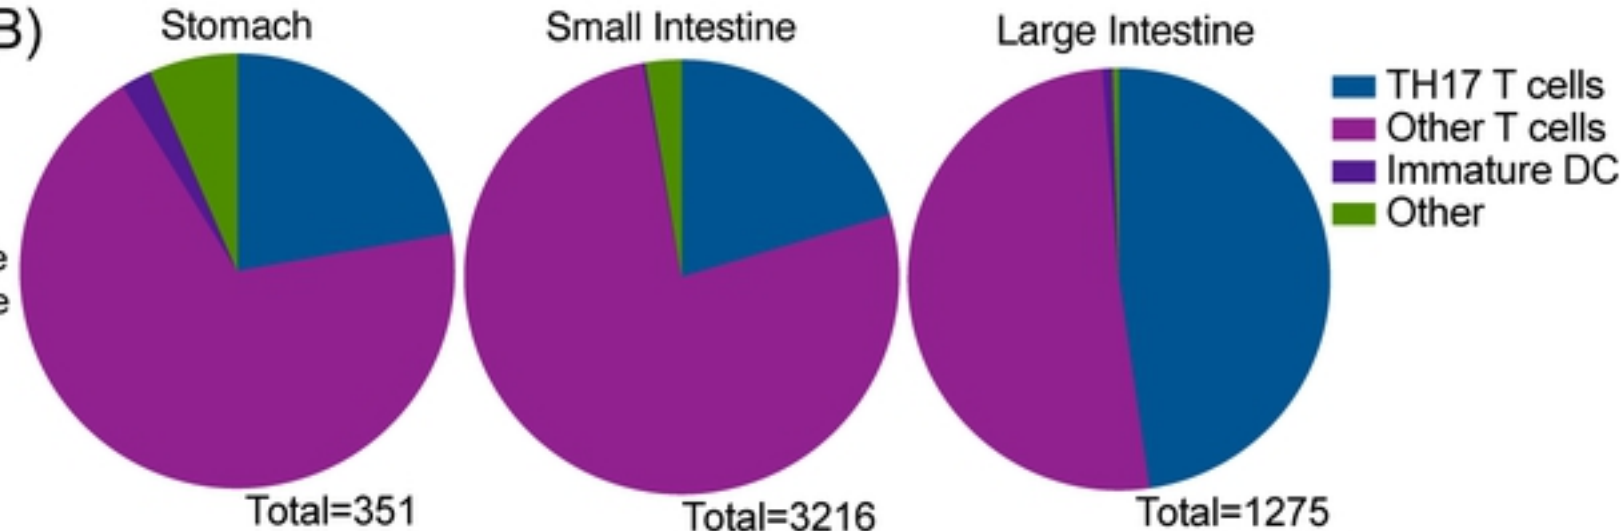

Fig5



2 Hours

4 Hours

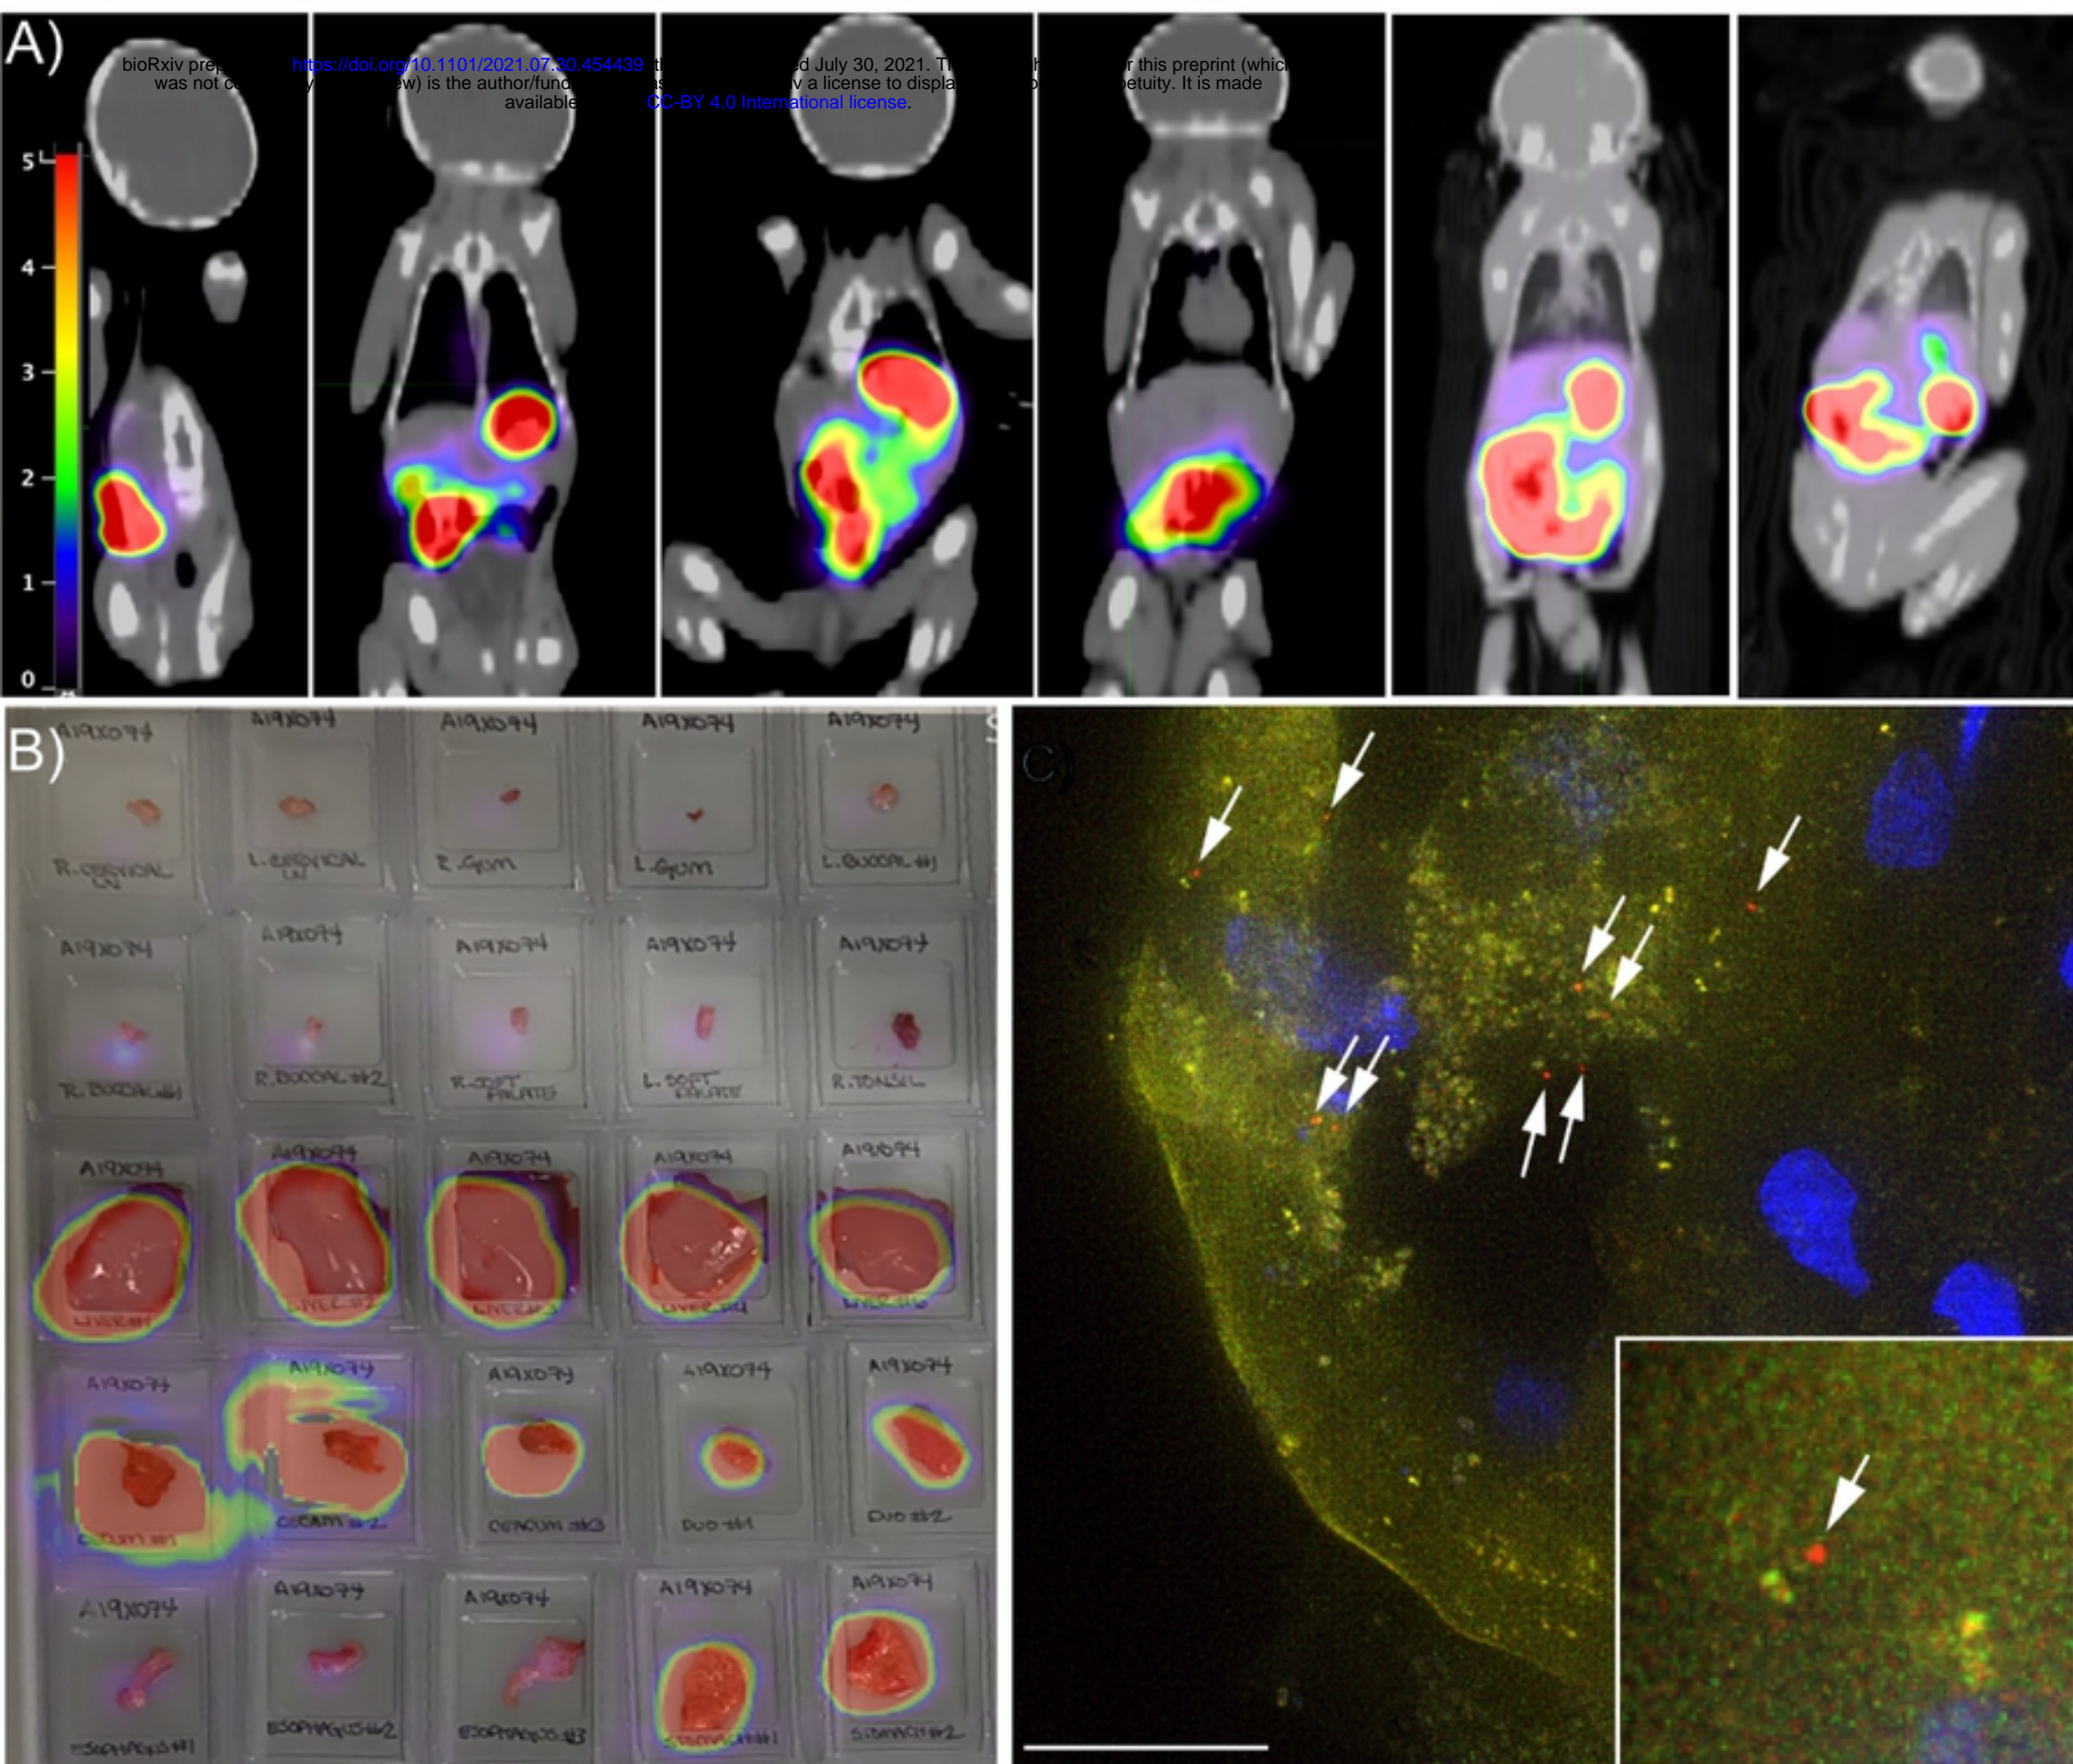

Fig1



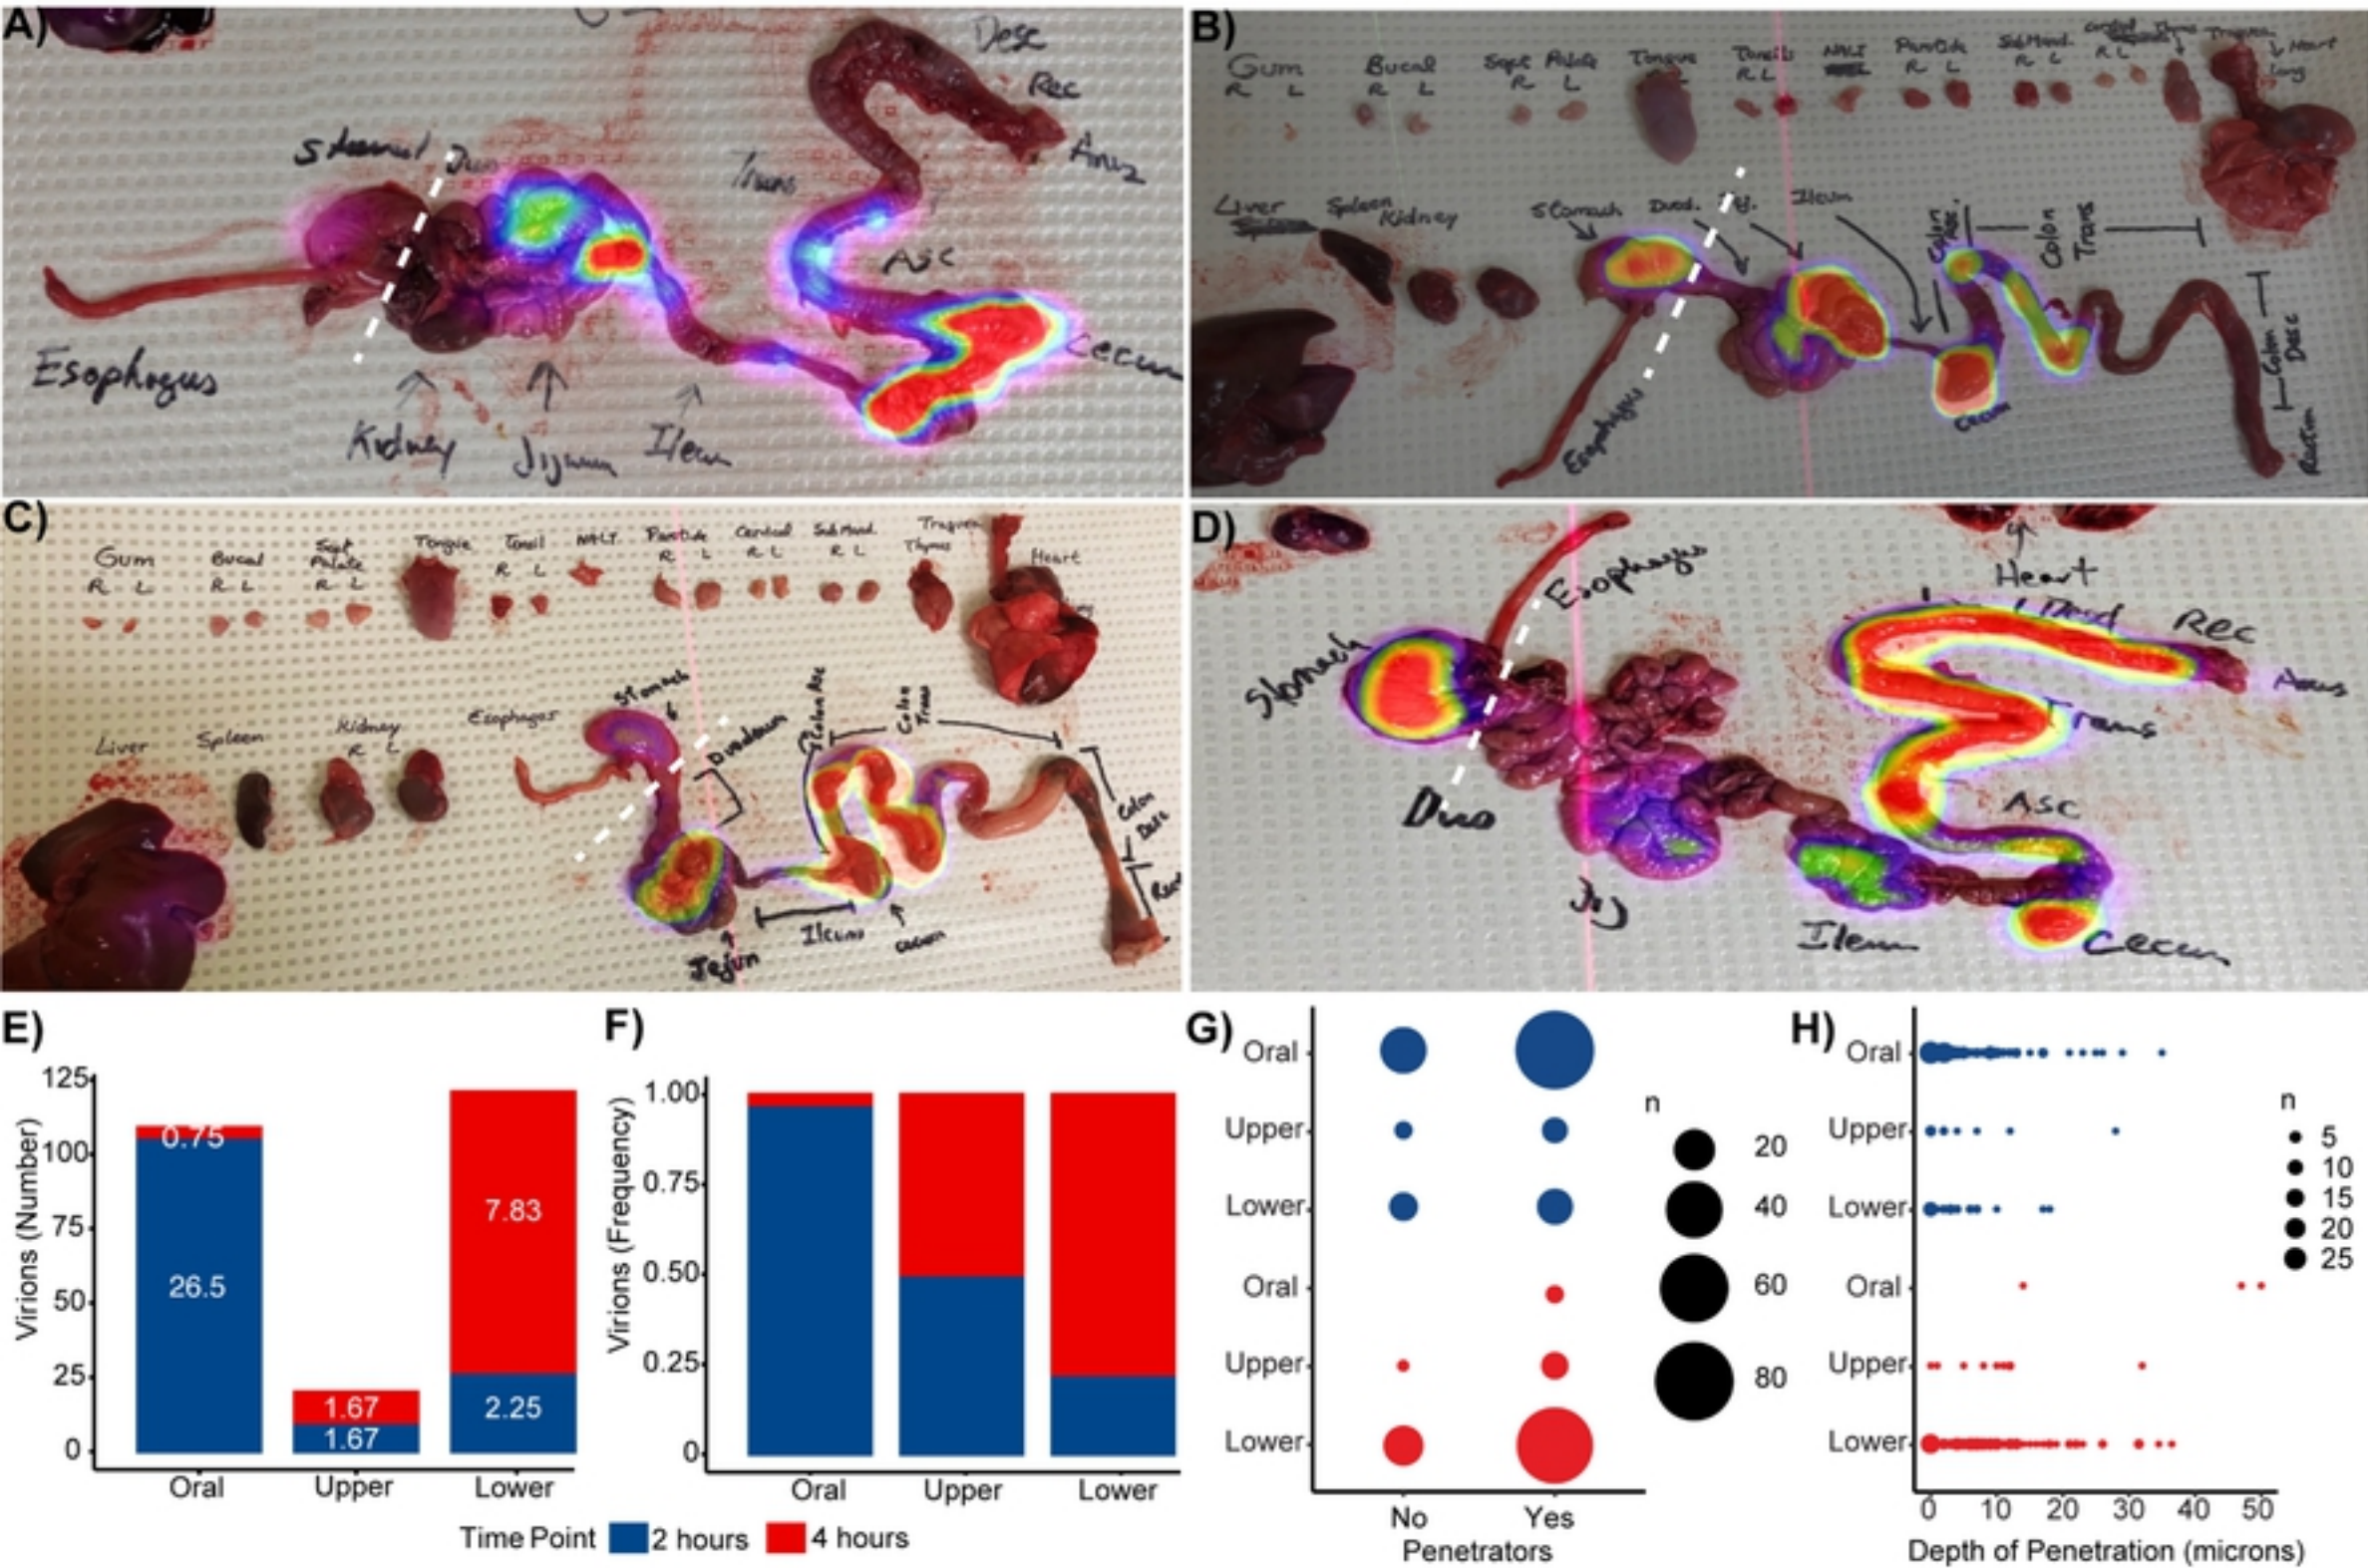

Fig2
